# Supplementary material
Source: PubMed Central journal article supplement (PMC8000278)
Supplement: pnas.2024865118.sapp.pdf [file pnas.2024865118.sapp.pdf]

# PNAS

[www.pnas.org](http://www.pnas.org)

Supplementary Information for

Crtc Modulates Fasting Programs Associated with 1-C Metabolism and Inhibition of Insulin Signaling

Tian Wang, Ezra Wiater, Xinmin Zhang, John Thomas, Marc Montminy

Marc Montminy  
Email: [montminy@salk.edu](mailto:montminy@salk.edu)

**This PDF file includes:**

Figures S1 to S4  
Tables S1 to S11

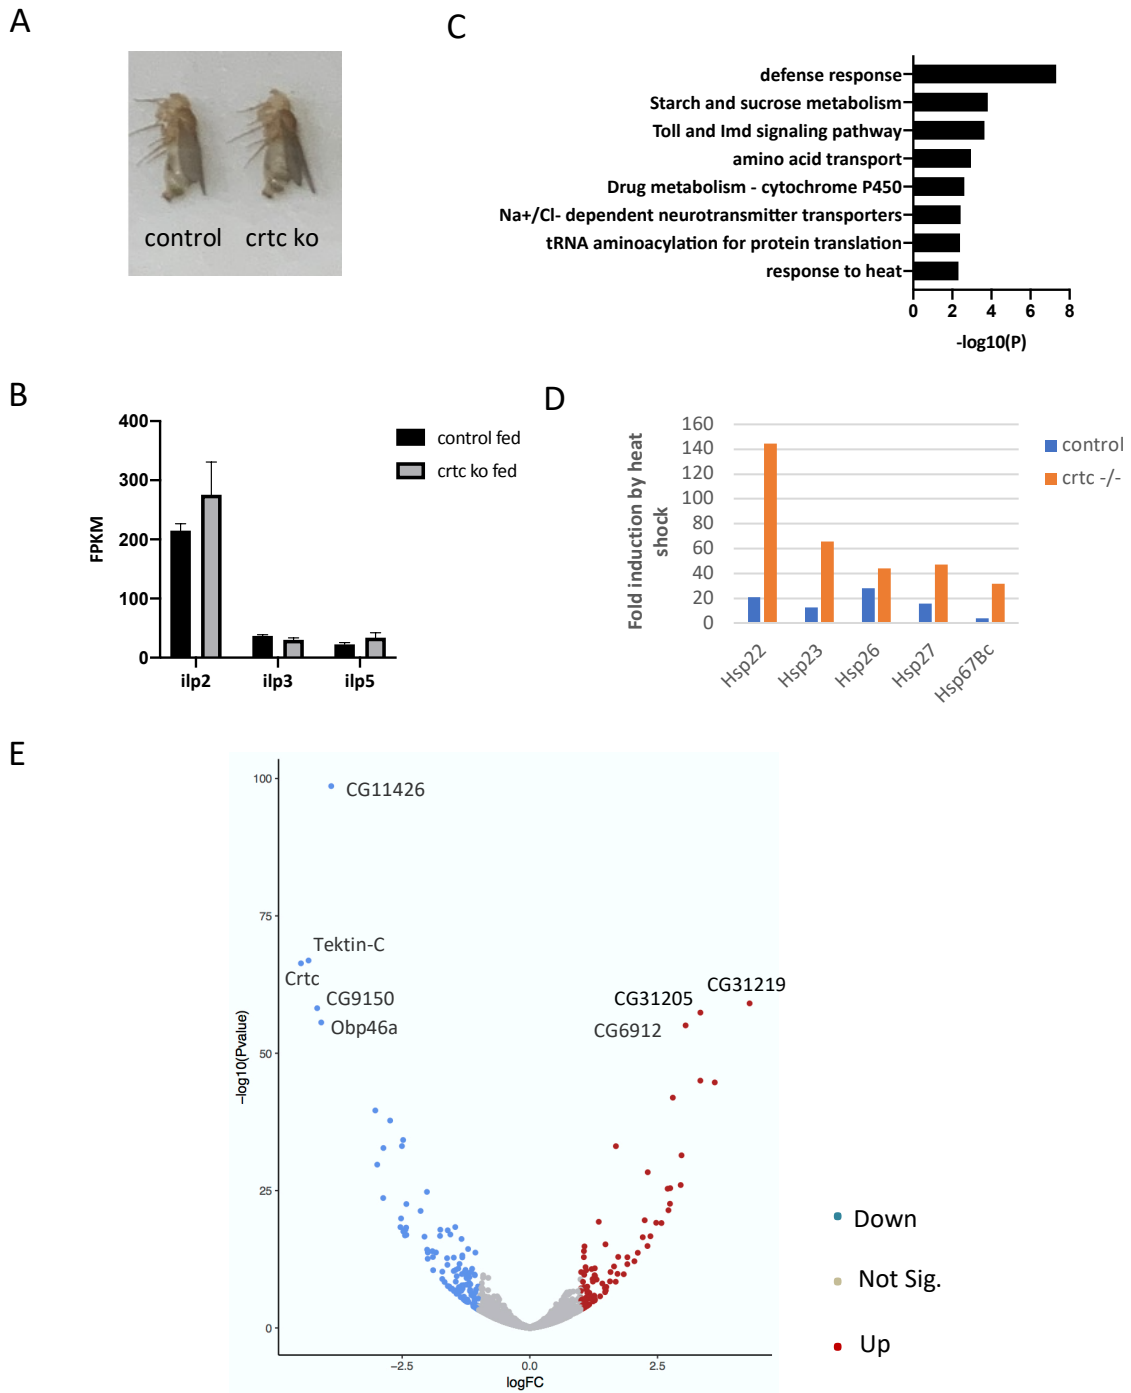

**Fig. S1. CRTC promotes starvation resistance.** (A) Comparison of body sizes between control and Crtc KO adult flies. (B) Comparison of Dilp expression in control and Crtc KO flies in the fed state. (C) Gene ontology enrichment analysis with the list of down-regulated genes in Crtc KO in the fed state. (D) Fold change of several small heat shock mRNAs in response to thermal stress in control and Crtc KO. (E) Volcano plot showing significantly altered genes in the absence of Crtc in the fed state in fly heads; Blue and red dots in the volcano plot indicate genes fulfilling the

following criteria, fold change > 2 and adjusted p value < 0.05; Blue dots are down-regulated genes and red dots are up-regulated genes in Crtc KO.

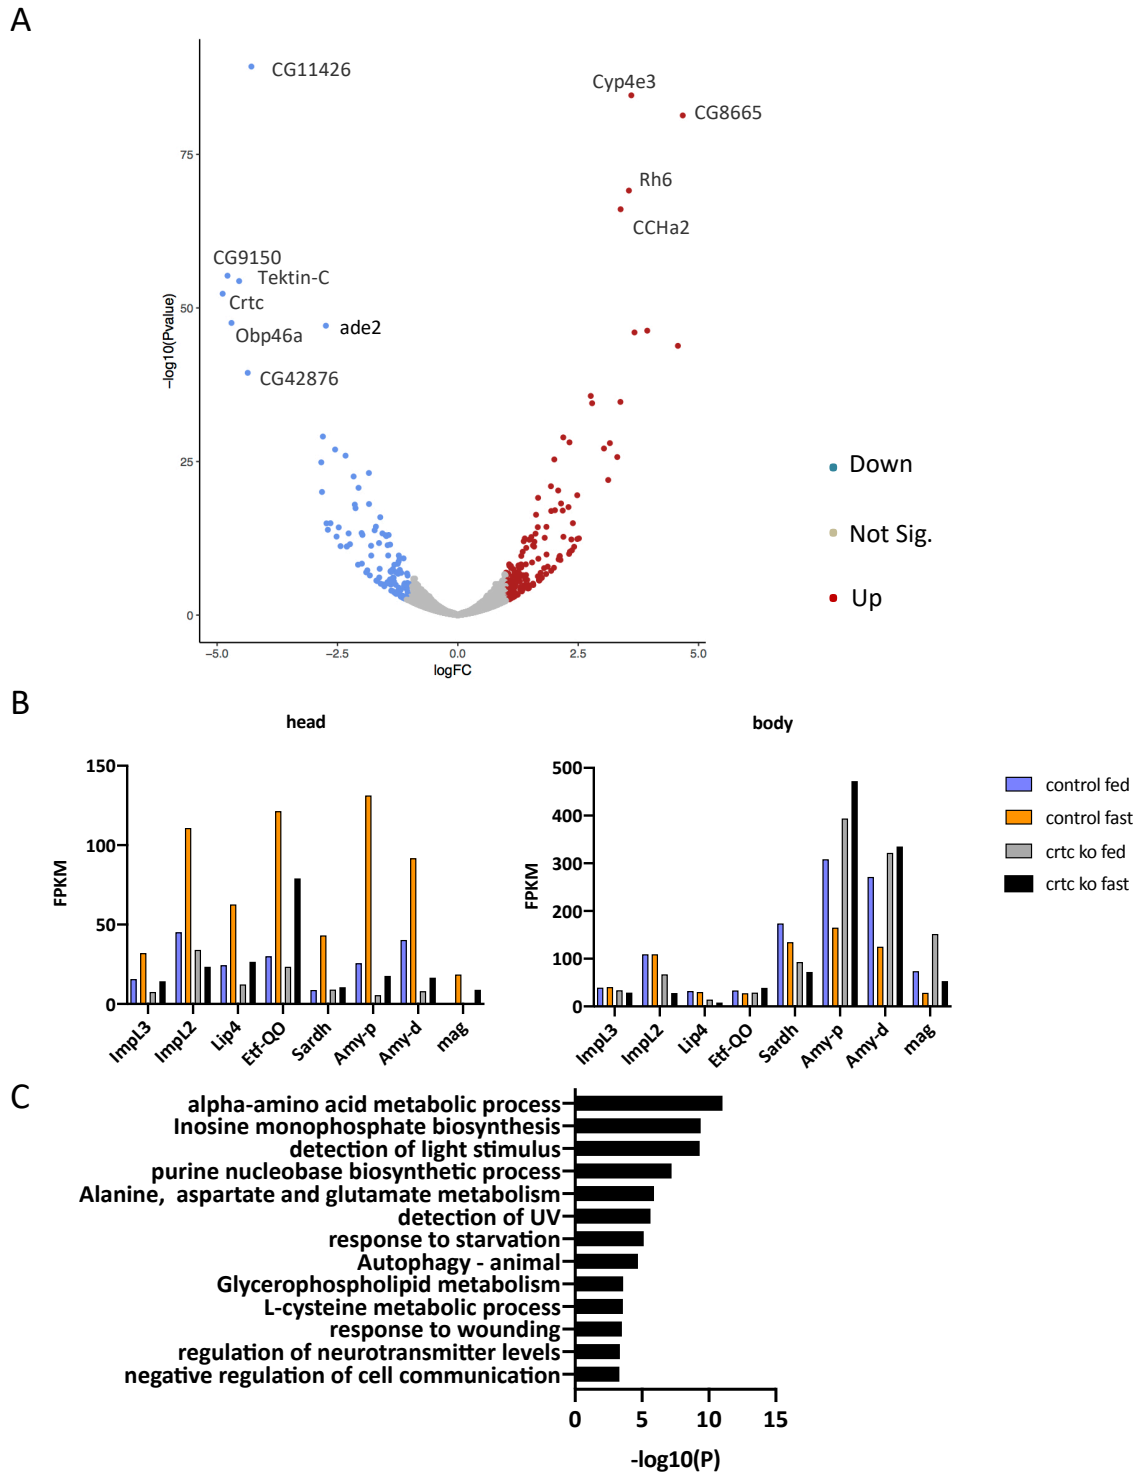

**Fig. S2. CRTC promotes fasting-inducible gene expression.** (A) Volcano plot showing significantly altered genes in Crtc KO fly heads in the fasted state compared with control; The blue and red dots in the volcano plot indicate genes fulfilling the following criteria, fold change > 2 and adjusted p value < 0.05; Blue dots correspond to down-regulated genes and red dots are up-regulated genes in Crtc KO. (B) Examples of fasting-inducible genes in the fly head but not in the

body from RNA-seq studies. (C) Gene ontology enrichment analysis with fasting-inducible genes in the fly body.

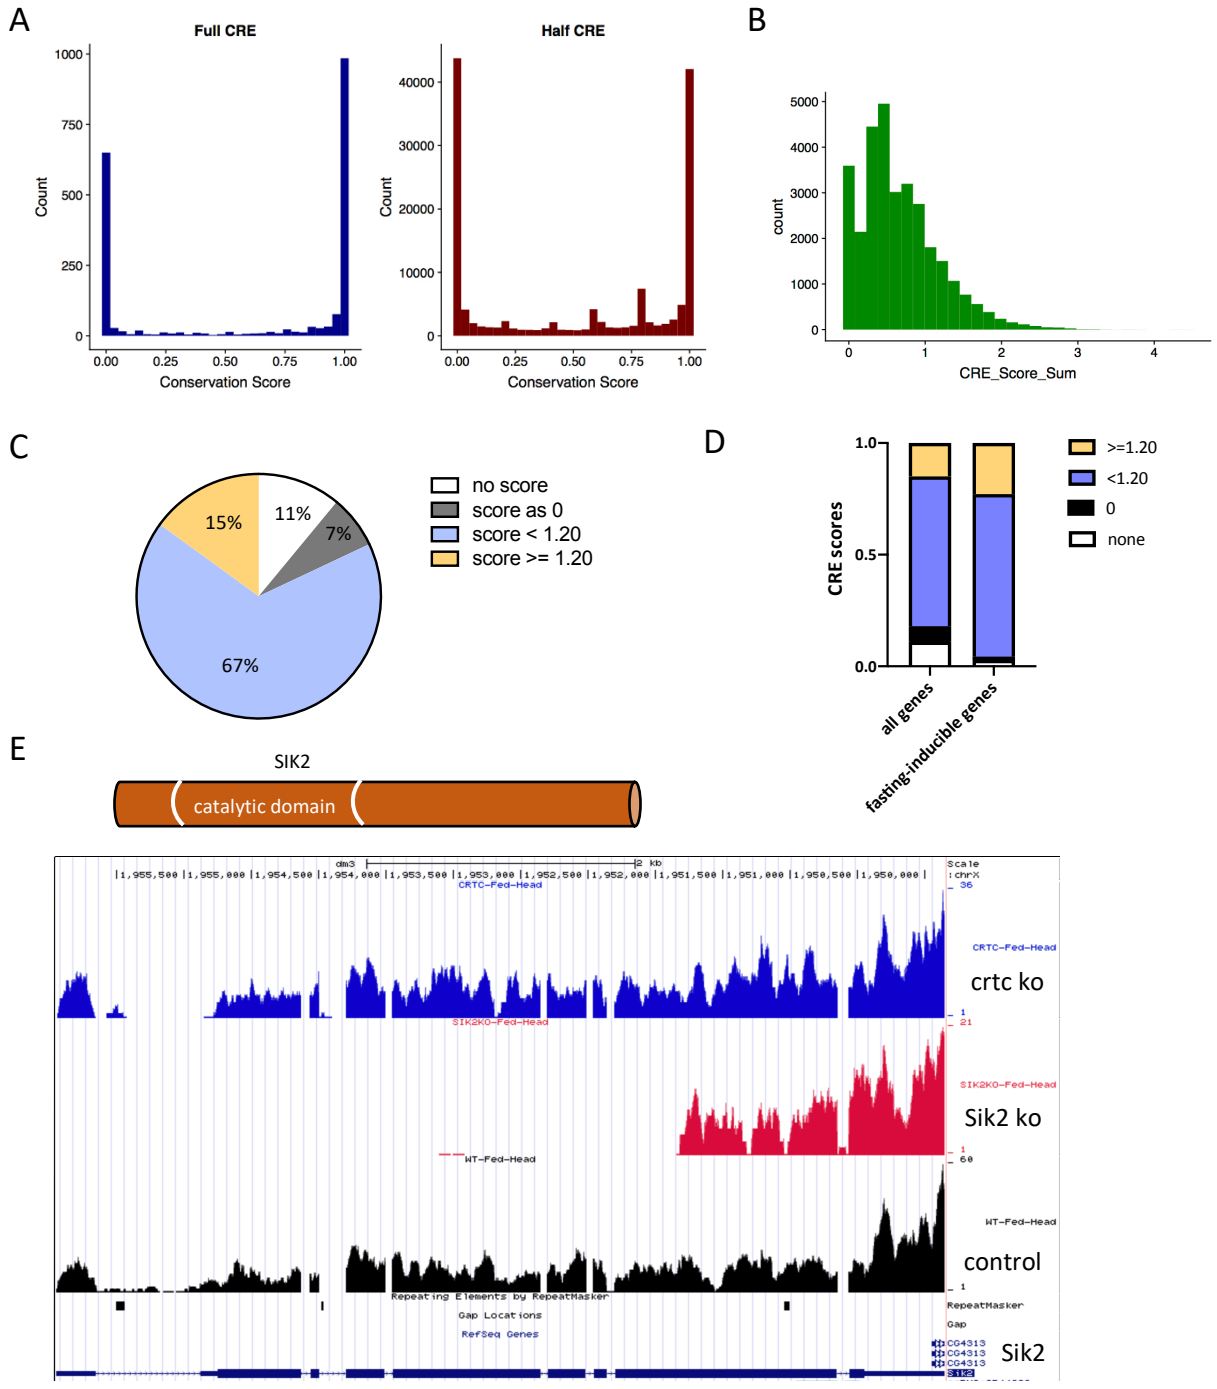

**Fig. S3. CREB binding sites in the fly genome.** (A) Conservation score distribution for all full CRE sites and half CRE sites in the fly genome. (B) CRE score distribution for all fly genes. (C) Percentage of fly genes with no CRE score, score as 0, score less than 1.2, score equals to or higher than 1.20. (D) Enrichment of genes having greater CRE scores among fasting-inducible genes compared with all genes in the fly genome. (E) Schematic diagram showing deletion of the

catalytic domain in Sik2 mutant, UCSC genome browser view showing no transcripts of the catalytic domain in Sik2 KO.

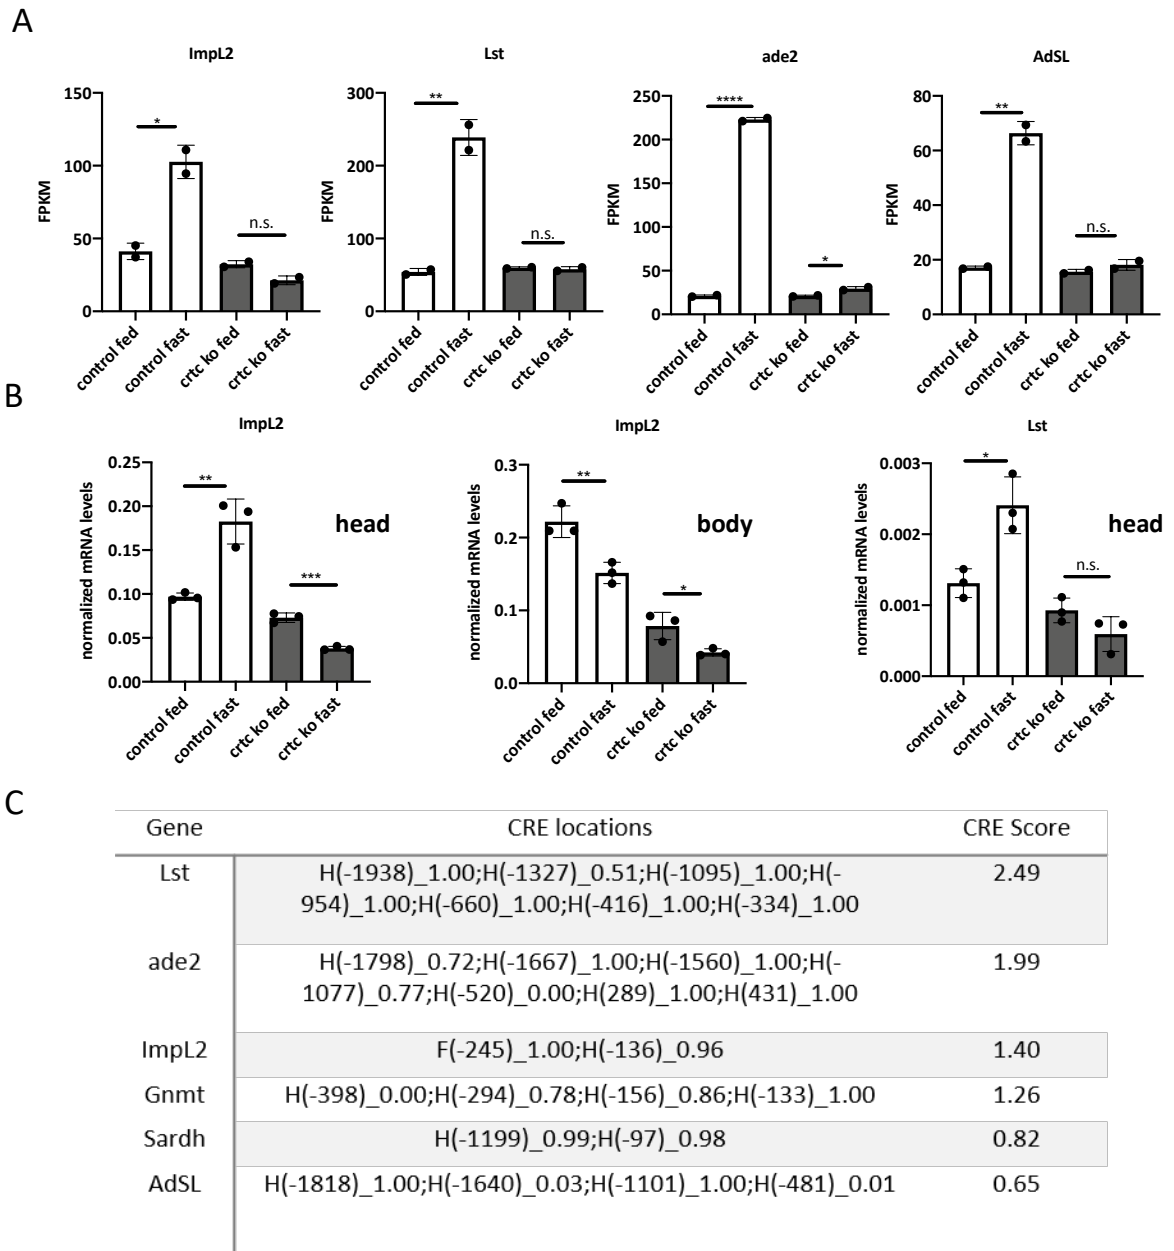

**Fig. S4. CRTC stimulates expression of genes involved in one carbon metabolism and inhibition of insulin signaling.** (A) Impl2, Lst, Ade2 and AdSL mRNA levels in adult fly head, genotypes and conditions as indicated. (B) Impl2 mRNA levels in adult fly head and fly body, Lst mRNA levels in adult fly head. (C) CRE information for CRTC target genes, Gnmt, Sardh, ade2, AdSL, Impl2 and Lst; The CREs are listed in the following format: {Full or Half site}(distance to transcription start site)\_(conservation score). The listed CRE sites are within 2kb upstream and 500 bp downstream of transcription start site (TSS).



**Table S1. FKPM of the 91 fasting-inducible genes shown in the heatmap in Figure 2A.**

| Gene    | white fed-1 | white fasted-1 | crtc ko fed-1 | crtc ko fasted-1 | white fed-2 | white fasted-2 | crtc ko fed-2 | crtc ko fasted-2 |
|---------|-------------|----------------|---------------|------------------|-------------|----------------|---------------|------------------|
| AdSL    | 16.7971     | 63.3695        | 16.2366       | 16.7526          | 17.5305     | 69.3623        | 15.0338       | 19.542           |
| Adgf-D  | 35.0991     | 93.7841        | 19.738        | 44.6331          | 39.3781     | 98.0226        | 20.8751       | 51.2627          |
| Ahcy13  | 40.163      | 186.488        | 48.1101       | 124.307          | 45.5154     | 232.735        | 62.0369       | 176.734          |
| Amy-d   | 40.3109     | 91.8234        | 8.05947       | 16.5523          | 39.1519     | 106.73         | 8.07528       | 19.0611          |
| Amy-p   | 25.6619     | 131.343        | 5.59577       | 17.6509          | 41.997      | 249.488        | 7.18074       | 30.6622          |
| CG10361 | 9.26351     | 23.1892        | 11.4537       | 16.5109          | 10.0192     | 20.1996        | 8.66629       | 19.6257          |
| CG10383 | 11.5323     | 116.572        | 14.7199       | 115.8            | 11.6033     | 98.0487        | 13.8337       | 131.567          |
| CG10924 | 1.19038     | 9.03302        | 14.7855       | 309.861          | 0.662564    | 10.1542        | 15.4561       | 314.401          |
| CG11089 | 47.0503     | 473.121        | 44.5705       | 352.171          | 51.666      | 551.476        | 49.047        | 493.115          |
| CG11425 | 13.6814     | 65.9586        | 9.14394       | 15.0363          | 16.2685     | 88.0609        | 9.95437       | 19.2099          |
| CG11899 | 56.3361     | 236.515        | 43.0674       | 147.884          | 75.0046     | 297.224        | 63.9936       | 223.879          |
| CG12262 | 91.9173     | 229.803        | 57.5061       | 241.92           | 98.9623     | 285.442        | 76.6946       | 302.765          |
| CG12428 | 15.1111     | 32.3386        | 13.9302       | 68.4965          | 12.1667     | 27.6657        | 14.0539       | 72.1496          |
| CG12825 | 2.87892     | 7.61335        | 5.86584       | 6.49136          | 2.96372     | 10.2605        | 7.28814       | 14.6437          |
| CG14022 | 18.3206     | 43.2952        | 21.1198       | 40.9702          | 21.6653     | 52.169         | 16.5563       | 50.3155          |
| CG1441  | 11.2366     | 42.2186        | 11.7915       | 61.5             | 16.814      | 47.3026        | 15.5292       | 80.8113          |
| CG1673  | 20.5933     | 168.432        | 11.2326       | 125.789          | 20.6106     | 168.451        | 12.1991       | 160.781          |
| CG16758 | 130.513     | 399.878        | 174.847       | 508.291          | 135.253     | 430.516        | 225.579       | 683.829          |
| CG17597 | 9.4166      | 22.6449        | 9.38089       | 21.3864          | 10.671      | 22.2608        | 11.1607       | 28.015           |
| CG18547 | 5.26581     | 10.9306        | 9.19137       | 14.0241          | 6.57959     | 13.7309        | 8.31962       | 16.2807          |
| CG3011  | 59.6602     | 267.124        | 49.6518       | 135.65           | 78.7801     | 351.644        | 66.6977       | 202.676          |
| CG3036  | 103.006     | 283.831        | 106.605       | 266.424          | 95.4978     | 264.654        | 99.8258       | 276.428          |
| CG32687 | 39.3269     | 79.6463        | 43.1923       | 101.627          | 42.066      | 98.0134        | 49.4429       | 135.222          |
| CG34136 | 23.3956     | 90.5076        | 11.9213       | 145.929          | 25.957      | 80.5056        | 23.2731       | 185.232          |
| CG3999  | 4.33155     | 11.1878        | 3.11073       | 2.90627          | 3.22242     | 10.3202        | 2.96295       | 4.03465          |
| CG42675 | 3.17485     | 8.53324        | 9.0937        | 13.6906          | 7.16253     | 15.4732        | 12.0222       | 17.5704          |
| CG42708 | 24.0167     | 51.4001        | 24.4375       | 68.1889          | 26.8587     | 56.6871        | 26.3892       | 78.1702          |
| CG42751 | 11.3258     | 26.3296        | 3.34603       | 10.1142          | 4.07687     | 18.414         | 0.937289      | 6.80403          |
| CG42806 | 43.7838     | 106.207        | 40.379        | 129.546          | 42.8982     | 123.312        | 53.2167       | 158.784          |
| CG42876 | 14.4527     | 63.011         | 0.556784      | 0                | 12.4367     | 51.4113        | 0             | 0                |
| CG45087 | 128.411     | 1015.95        | 170.918       | 959.988          | 125.211     | 1022.95        | 189.98        | 1137.27          |
| CG5321  | 15.3759     | 34.7839        | 17.4786       | 72.1809          | 18.6831     | 39.6896        | 24.2854       | 87.7037          |
| CG5953  | 8.87284     | 31.2392        | 6.4661        | 28.838           | 7.90384     | 28.366         | 6.64343       | 26.7738          |
| CG5955  | 21.9575     | 98.4232        | 24.4062       | 92.0661          | 28.6872     | 133.199        | 30.0838       | 132.185          |
| CG5966  | 6.92595     | 191.985        | 2.81093       | 152.721          | 6.98767     | 186.364        | 2.4971        | 159.758          |
| CG6188  | 161.718     | 441.55         | 80.8978       | 134.305          | 170.253     | 485.444        | 112.259       | 171.064          |
| CG6287  | 186.093     | 438.146        | 190.196       | 342.784          | 243.751     | 605.924        | 255.212       | 521.919          |
| CG6385  | 8.79331     | 43.2456        | 9.08925       | 10.5644          | 10.5677     | 41.6326        | 8.95202       | 11.514           |
| CG6767  | 182.024     | 480.635        | 161.533       | 274.463          | 147.959     | 335.927        | 128.185       | 237.604          |
| CG7059  | 14.7528     | 61.7184        | 11.9323       | 44.8833          | 15.7302     | 70.4568        | 17.592        | 56.3298          |
| CG7530  | 36.4632     | 81.3763        | 33.9732       | 100.197          | 33.9104     | 84.2234        | 33.0662       | 118.953          |

| <b>Continued.</b><br>Gene | white fed-1 | white fasted-1 | crtc ko fed-1 | crtc ko fasted-1 | white fed-2 | white fasted-2 | crtc ko fed-2 | crtc ko fasted-2 |
|---------------------------|-------------|----------------|---------------|------------------|-------------|----------------|---------------|------------------|
| CG7763                    | 2.42172     | 40.6286        | 0.443598      | 0.968973         | 1.41435     | 28.0125        | 0.385946      | 1.6204           |
| CG8112                    | 20.6586     | 54.3355        | 22.3891       | 63.2502          | 24.6903     | 68.2208        | 42.0931       | 97.0992          |
| CG8129                    | 9.18211     | 39.4921        | 6.99164       | 64.7438          | 8.42901     | 40.6992        | 10.3804       | 69.8552          |
| CG8249                    | 2.9306      | 12.7243        | 4.36089       | 8.96511          | 3.896       | 12.0974        | 5.3103        | 11.3701          |
| CG8317                    | 57.4598     | 256.195        | 60.7098       | 60.3549          | 50.6727     | 221.342        | 58.879        | 55.5653          |
| CG8468                    | 24.6931     | 50.7867        | 42.6062       | 78.4221          | 26.4319     | 59.1348        | 47.7428       | 90.8028          |
| CG8654                    | 10.5881     | 40.2272        | 7.24561       | 56.4715          | 9.24608     | 41.9767        | 10.1829       | 63.6345          |
| CG9547                    | 13.7822     | 39.9601        | 16.0278       | 29.6957          | 15.8721     | 47.2664        | 15.2245       | 35.5381          |
| CG9757                    | 1.50756     | 10.6237        | 1.36311       | 3.77781          | 2.57607     | 15.1652        | 4.09725       | 1.83356          |
| CR44138                   | 5.7076      | 13.3512        | 3.41157       | 16.2284          | 3.17872     | 11.0231        | 7.98604       | 24.1834          |
| CR44816                   | 4.63352     | 31.5846        | 14.25         | 15.8337          | 8.6506      | 24.2578        | 21.2199       | 17.6342          |
| CR45018,IP3K2             | 10.904      | 26.6712        | 3.3112        | 4.0368           | 8.94743     | 30.7661        | 6.71452       | 4.91237          |
| Cyp4ac3                   | 7.90791     | 18.9149        | 6.98494       | 16.7448          | 6.95096     | 16.1381        | 4.90868       | 17.8907          |
| Cyp4e2                    | 32.6891     | 79.5329        | 36.273        | 97.6722          | 28.533      | 62.8803        | 35.4863       | 99.975           |
| Cyp4e3                    | 5.56986     | 105.237        | 7.0611        | 1478.5           | 6.10292     | 98.0905        | 8.33451       | 1620.98          |
| Cyp4p1                    | 26.191      | 61.8988        | 12.4212       | 18.2753          | 25.0887     | 54.4007        | 13.2449       | 18.4404          |
| Cyp6a2                    | 13.4251     | 32.9618        | 14.1802       | 31.9297          | 18.1469     | 36.8792        | 22.2143       | 36.0711          |
| Cyp6a8                    | 3.59867     | 21.093         | 2.70798       | 26.159           | 2.27537     | 18.2994        | 2.25592       | 22.6416          |
| Cyp6w1                    | 46.9063     | 104.962        | 45.1286       | 101.444          | 38.8924     | 101.928        | 43.401        | 111.949          |
| Etf-QO                    | 30.0868     | 121.487        | 23.435        | 79.078           | 34.7504     | 137.687        | 31.3663       | 102.634          |
| Fuca                      | 4.59449     | 10.3243        | 4.78042       | 12.103           | 5.14272     | 13.7622        | 5.88957       | 15.1525          |
| Gillspla2                 | 26.0755     | 236.607        | 16.1738       | 141.684          | 33.0719     | 299.733        | 20.8027       | 185.632          |
| ldgf1                     | 32.2723     | 83.9368        | 24.8749       | 25.8994          | 28.6079     | 72.6051        | 20.1755       | 28.8307          |
| ImpL2                     | 45.175      | 110.759        | 34.0735       | 23.3999          | 37.1806     | 94.5664        | 30.6086       | 19.1425          |
| ImpL3                     | 15.7376     | 32.0953        | 7.61076       | 14.3405          | 20.696      | 44.4639        | 8.95344       | 30.3095          |
| InR                       | 7.30988     | 16.4978        | 8.43799       | 19.6895          | 4.21841     | 9.00552        | 4.95771       | 9.94683          |
| Lip4                      | 24.4435     | 62.6641        | 12.3448       | 26.5589          | 23.9901     | 52.4195        | 11.4374       | 29.3778          |
| Mal-B2                    | 96.3998     | 669.68         | 48.6989       | 269.2            | 100.094     | 638.215        | 49.4414       | 310.585          |
| Nmdmc                     | 61.4896     | 265.04         | 16.6023       | 103.112          | 64.8414     | 290.859        | 20.2344       | 169.627          |
| Reg-2                     | 35.2561     | 90.3193        | 32.7774       | 82.0982          | 33.8022     | 96.2059        | 44.1083       | 124.562          |
| SCOT                      | 15.9249     | 32.0679        | 26.6161       | 51.5792          | 18.7956     | 40.3409        | 36.1338       | 64.4257          |
| Scfp                      | 13.4221     | 28.8431        | 16.1177       | 54.5939          | 11.2739     | 31.6172        | 13.6986       | 45.8278          |
| Sirup                     | 165.943     | 491.735        | 154.79        | 658.011          | 204.041     | 688.781        | 247.796       | 1024.06          |
| Spat                      | 48.7003     | 146.76         | 29.5468       | 159.048          | 54.0694     | 182.198        | 43.5224       | 224.986          |
| Spn27A                    | 25.7639     | 52.6072        | 28.1447       | 40.9363          | 35.2433     | 73.049         | 36.5791       | 65.7402          |
| Spn88Eb                   | 21.1737     | 68.585         | 10.431        | 94.2221          | 14.8672     | 69.6537        | 8.66629       | 98.1283          |
| T3dh                      | 4.4633      | 12.0849        | 7.30253       | 22.2623          | 5.00744     | 10.3933        | 7.84543       | 30.6558          |
| Thor                      | 389.102     | 1046.23        | 215.175       | 1139.52          | 290.12      | 870.693        | 186.779       | 1146.56          |
| Tsp42Ed                   | 29.5065     | 106.539        | 21.9967       | 60.5994          | 36.51       | 150.441        | 26.925        | 97.0388          |
| aay                       | 152.296     | 596.289        | 146.836       | 805.379          | 152.313     | 589.869        | 157.188       | 938.596          |
| ade2                      | 21.9207     | 224.684        | 21.7226       | 31.0683          | 20.24       | 221.158        | 20.5704       | 27.9121          |
| ade3                      | 21.7572     | 172.647        | 23.5168       | 148.232          | 23.5109     | 188.468        | 20.9603       | 177.27           |
| ade5                      | 135.1       | 624.706        | 106.359       | 392.273          | 120.563     | 580.371        | 97.526        | 403.77           |
| atk                       | 2.04769     | 26.4547        | 0.94025       | 9.31988          | 1.15279     | 22.9189        | 0.886715      | 10.6438          |
| bmm                       | 31.9207     | 157.38         | 23.2108       | 107.7            | 29.0347     | 140.446        | 22.0193       | 112.554          |
| fbp                       | 62.3036     | 188.27         | 51.8783       | 143.613          | 69.9337     | 221.455        | 65.7054       | 183.645          |

| <b>Continued.</b><br>Gene | white fed-1 | white<br>fasted-1 | crtc ko<br>fed-1 | crtc ko<br>fasted-1 | white fed-2 | white<br>fasted-2 | crtc ko<br>fed-2 | crtc ko<br>fasted-2 |
|---------------------------|-------------|-------------------|------------------|---------------------|-------------|-------------------|------------------|---------------------|
| mag                       | 0.212542    | 18.5618           | 0.197171         | 8.90934             | 0.311792    | 18.4102           | 0                | 11.5792             |
| pug                       | 61.2127     | 173.727           | 65.5517          | 80.8201             | 69.2697     | 186.508           | 67.7489          | 100.522             |
| rost                      | 6.22428     | 17.0486           | 4.69874          | 4.01136             | 4.88496     | 15.5597           | 3.20835          | 3.38676             |
| yip2                      | 87.568      | 191.979           | 96.6058          | 356.691             | 75.1095     | 199.15            | 95.5022          | 440.876             |

**Table S2. FKPM of the 92 fasting-downregulated genes shown in the heatmap in Figure 2A.**

| Gene    | white fed-1 | white fasted-1 | crtc ko fed-1 | crtc ko fasted-1 | white fed-2 | white fasted-2 | crtc ko fed-2 | crtc ko fasted-2 |
|---------|-------------|----------------|---------------|------------------|-------------|----------------|---------------|------------------|
| AQP     | 15.2232     | 7.25833        | 6.29179       | 8.14339          | 18.8018     | 9.3815         | 11.5136       | 10.7339          |
| CCHa2   | 140.416     | 46.2777        | 385.545       | 558.026          | 113.34      | 39.6834        | 384.548       | 584.052          |
| CG10026 | 24.9056     | 9.50822        | 22.411        | 13.0759          | 24.1495     | 10.1281        | 21.5111       | 16.0761          |
| CG10516 | 20.4593     | 4.71609        | 20.0686       | 12.4948          | 21.1041     | 8.03656        | 33.2291       | 15.7635          |
| CG10657 | 14.4725     | 4.74895        | 27.6141       | 25.5457          | 17.5231     | 5.3308         | 38.2009       | 25.269           |
| CG11458 | 34.6403     | 16.6845        | 19.3294       | 55.4152          | 35.7804     | 12.5905        | 34.3643       | 57.0793          |
| CG11741 | 30.9492     | 7.65818        | 7.72299       | 10.4719          | 34.0929     | 12.4575        | 6.21418       | 5.25529          |
| CG13026 | 18.7348     | 9.16835        | 4.4036        | 5.56189          | 13.8514     | 6.6203         | 3.79254       | 5.66331          |
| CG13360 | 14.5398     | 6.37356        | 13.7721       | 14.836           | 17.4926     | 6.98326        | 21.615        | 17.2556          |
| CG13422 | 189.98      | 53.5589        | 104.078       | 173.738          | 173.731     | 58.7743        | 147.188       | 69.9701          |
| CG13607 | 50.774      | 8.63793        | 44.5269       | 29.0999          | 57.9817     | 13.9641        | 53.9516       | 41.6156          |
| CG14246 | 10.3756     | 2.126          | 6.48226       | 8.80269          | 8.38832     | 3.28978        | 6.17281       | 9.01711          |
| CG14298 | 28.3306     | 9.81222        | 41.7565       | 27.4726          | 30.7157     | 10.0406        | 47.1893       | 31.008           |
| CG14419 | 56.6704     | 16.1095        | 132.105       | 114.968          | 51.9591     | 14.8621        | 153.157       | 106.94           |
| CG14439 | 18.7015     | 8.02454        | 26.1052       | 18.2527          | 20.6159     | 7.64653        | 27.6736       | 24.6569          |
| CG14567 | 29.8658     | 5.56581        | 5.74566       | 2.09715          | 29.1166     | 7.64445        | 8.73327       | 1.30835          |
| CG14687 | 246.401     | 110.896        | 94.0404       | 75.3832          | 278.43      | 128.358        | 100.762       | 83.6248          |
| CG14688 | 51.0619     | 18.3249        | 37.2978       | 34.9336          | 41.8128     | 20.8604        | 44.0583       | 36.7613          |
| CG15021 | 30.0545     | 12.6703        | 26.1978       | 21.8873          | 33.1099     | 14.9118        | 22.6485       | 23.5594          |
| CG15096 | 125.249     | 62.0822        | 75.8772       | 48.0592          | 116.53      | 56.1353        | 82.5477       | 57.051           |
| CG15282 | 50.2254     | 2.64061        | 96.25         | 18.2479          | 52.9552     | 1.67601        | 108.99        | 14.9618          |
| CG15353 | 49.7162     | 6.34945        | 121.47        | 85.1264          | 32.9278     | 9.78859        | 111.764       | 72.0832          |
| CG15394 | 29.3528     | 12.6228        | 18.2449       | 17.2183          | 13.751      | 6.40118        | 14.9884       | 10.4921          |
| CG16756 | 84.0774     | 29.7057        | 85.0088       | 66.0768          | 79.5237     | 34.4511        | 102.614       | 56.9479          |
| CG16772 | 128.505     | 41.4856        | 111.351       | 55.6516          | 115.555     | 46.2701        | 115.391       | 55.9641          |
| CG18302 | 21.989      | 10.186         | 25.1367       | 12.9099          | 18.8709     | 8.08367        | 22.2889       | 12.8753          |
| CG18522 | 32.4063     | 16.0412        | 37.7849       | 22.9602          | 32.5735     | 13.4603        | 38.1503       | 24.7106          |
| CG1887  | 35.7074     | 16.9701        | 45.9201       | 21.8488          | 40.3738     | 14.7799        | 45.3963       | 22.0278          |
| CG2781  | 47.4576     | 16.0672        | 51.9637       | 43.0795          | 30.81       | 13.029         | 39.7523       | 33.2394          |
| CG3348  | 55.8917     | 6.41403        | 27.0327       | 8.12234          | 57.7512     | 7.62169        | 20.652        | 10.4457          |
| CG34165 | 19.387      | 9.3146         | 57.9329       | 21.2433          | 25.5837     | 4.12451        | 64.3377       | 19.716           |
| CG34291 | 25.2508     | 12.0932        | 29.9572       | 32.4891          | 25.9761     | 6.69029        | 18.8637       | 45.9715          |
| CG3630  | 25.6285     | 9.41675        | 20.1687       | 13.8155          | 32.1443     | 9.45962        | 23.4741       | 22.1312          |
| CG4000  | 160.892     | 71.9392        | 103.913       | 196.926          | 209.479     | 91.9745        | 143.325       | 277.324          |
| CG42821 | 21.3985     | 1.96881        | 17.0468       | 3.39313          | 22.1715     | 2.56589        | 18.6426       | 2.64016          |
| CG4288  | 22.8723     | 11.0093        | 10.7106       | 6.89487          | 29.5952     | 13.3997        | 16.1225       | 9.16197          |
| CG4461  | 84.1111     | 36.9514        | 18.5612       | 26.3799          | 84.1825     | 40.6637        | 16.5473       | 21.5666          |
| CG4462  | 12.2094     | 4.23832        | 10.9902       | 6.63022          | 11.5652     | 4.24489        | 9.97103       | 6.39652          |
| CG4797  | 32.2584     | 15.2468        | 29.2712       | 25.435           | 39.5536     | 19.3254        | 34.3817       | 32.0683          |
| CG5023  | 71.2803     | 29.3173        | 102.46        | 61.5055          | 92.4631     | 39.0797        | 142.82        | 72.6316          |
| CG5162  | 42.1312     | 18.5046        | 39.2905       | 21.9242          | 45.593      | 21.9213        | 46.3991       | 36.1221          |
| CG5707  | 33.5828     | 15.783         | 29.0956       | 41.3019          | 36.7705     | 16.3587        | 34.382        | 49.9529          |
| CG5773  | 232.81      | 70.0822        | 271.893       | 310.504          | 260.181     | 82.7332        | 361.379       | 444.955          |
| CG5991  | 101.696     | 36.8407        | 121.946       | 106.184          | 109.167     | 33.3414        | 132.389       | 123.799          |

| Continued.<br>Gene | white fed-1 | white fasted-1 | crtc ko fed-1 | crtc ko fasted-1 | white fed-2 | white fasted-2 | crtc ko fed-2 | crtc ko fasted-2 |
|--------------------|-------------|----------------|---------------|------------------|-------------|----------------|---------------|------------------|
| CG6126             | 47.9035     | 17.6791        | 40.0189       | 32.6486          | 55.0532     | 21.1578        | 44.7589       | 30.892           |
| CG7203             | 90.3285     | 23.041         | 84.4486       | 100.391          | 94.3532     | 35.578         | 99.9855       | 140.18           |
| CG7300             | 15.5972     | 6.44102        | 4.73044       | 7.6              | 14.8168     | 5.79956        | 10.1964       | 6.74069          |
| CG8147             | 10.592      | 0.145372       | 20.4574       | 0.97542          | 10.3496     | 0.207383       | 26.9725       | 0.850778         |
| CG9238             | 70.8084     | 15.9584        | 81.2319       | 63.5909          | 56.1193     | 11.0646        | 70.6845       | 62.5247          |
| CG9416             | 10.6749     | 4.05979        | 12.2991       | 7.31655          | 11.1208     | 3.61188        | 13.744        | 8.42306          |
| CG9436             | 48.0543     | 17.3364        | 44.0492       | 23.618           | 68.3684     | 24.2006        | 60.9599       | 37.9846          |
| CG9497             | 25.4737     | 11.4569        | 16.7037       | 20.8565          | 26.2701     | 13.0388        | 19.5281       | 25.3562          |
| CG9498             | 26.6387     | 6.99384        | 25.4862       | 13.1897          | 28.8025     | 9.27717        | 29.1172       | 16.62            |
| CG9747             | 19.9634     | 8.5947         | 32.6213       | 22.5583          | 20.5823     | 8.90891        | 37.4528       | 24.9766          |
| CG9837             | 36.9363     | 18.1992        | 41.9736       | 18.087           | 40.7903     | 13.9633        | 39.6555       | 19.1714          |
| CR43995            | 17.0737     | 7.09405        | 20.9975       | 17.0508          | 16.0577     | 6.05433        | 8.15335       | 5.57368          |
| CR44095            | 11.637      | 5.1848         | 17.5275       | 12.7111          | 11.6401     | 4.23156        | 15.8486       | 10.3301          |
| CR44772            | 20.6884     | 8.49755        | 20.8705       | 25.7425          | 16.0693     | 4.72352        | 6.38173       | 13.072           |
| Cg25C              | 15.4871     | 5.62379        | 19.3425       | 13.8735          | 17.173      | 4.86822        | 17.8155       | 9.70451          |
| Clect27            | 98.5889     | 28.4933        | 99.9697       | 57.6085          | 94.3551     | 28.8485        | 110.61        | 67.4332          |
| Cyp313a1           | 218.182     | 92.7605        | 217.309       | 158.772          | 161.92      | 61.2559        | 187.293       | 166.393          |
| Cyp6t1             | 14.8709     | 5.03121        | 15.0947       | 17.2244          | 10.2137     | 4.67213        | 13.0798       | 16.6418          |
| DNasell            | 72.7705     | 28.7374        | 33.3012       | 29.064           | 73.8104     | 35.5655        | 29.7572       | 35.2394          |
| Dat                | 133.295     | 64.6395        | 128.16        | 96.2054          | 169.633     | 80.2083        | 174.671       | 115.186          |
| DptB               | 242.283     | 54.9087        | 197.777       | 100.254          | 149.488     | 45.3797        | 200.935       | 10.5223          |
| Drsl4              | 649.489     | 230.811        | 94.9012       | 24.4116          | 517.34      | 201.535        | 105.174       | 19.1165          |
| IM14               | 6133.76     | 2509.58        | 2064.56       | 2310.86          | 2812.28     | 1363.26        | 1556.72       | 1239.87          |
| Listericin         | 279.291     | 92.7818        | 316.417       | 163.797          | 319.187     | 120.364        | 377.682       | 159.884          |
| Lsd-1              | 76.654      | 28.2794        | 69.7814       | 248.4            | 91.5707     | 38.9727        | 102.121       | 371.935          |
| Lsp1beta           | 83.5976     | 24.3847        | 329.017       | 106.897          | 74.3742     | 22.5976        | 331.058       | 101.255          |
| Lsp2               | 47.4257     | 15.3759        | 201.669       | 54.8567          | 39.2925     | 12.5692        | 212.438       | 70.0923          |
| Mlp60A             | 316.382     | 113.929        | 576.347       | 513.47           | 344.658     | 154.264        | 726.915       | 478.285          |
| Nplp2              | 5996.57     | 1954.5         | 4220.11       | 2930.23          | 4796.04     | 1552.87        | 4535.82       | 3230.15          |
| Nplp3              | 1081.29     | 401.409        | 1055.57       | 1513.93          | 946.7       | 353.979        | 982.982       | 1529.6           |
| Nplp4              | 20.0303     | 2.6821         | 45.6445       | 38.8696          | 6.83707     | 1.69982        | 34.7257       | 22.3083          |
| Obp99b             | 759.943     | 281.551        | 419.883       | 577.386          | 661.787     | 275.894        | 459.361       | 442.442          |
| Ork1               | 11.7987     | 4.08261        | 9.98325       | 3.5679           | 15.5876     | 6.67938        | 13.877        | 5.7834           |
| PGRP-SB1           | 243.79      | 81.9286        | 239.241       | 102.129          | 248.266     | 93.1065        | 288.921       | 106.638          |
| RabX5              | 7.57274     | 3.02597        | 5.57491       | 0.756836         | 11.9473     | 3.98451        | 7.01408       | 2.88684          |
| Rfabg              | 331.949     | 128.42         | 355.521       | 225.736          | 238.236     | 88.0808        | 269.447       | 177.903          |
| Tig                | 17.2134     | 6.47626        | 19.126        | 14.451           | 16.8029     | 5.62085        | 19.0724       | 15.3973          |
| TotX               | 74.3668     | 20.0439        | 81.1758       | 44.8433          | 51.7063     | 12.3143        | 75.8463       | 55.6714          |
| babos              | 49.9648     | 23.547         | 38.755        | 32.0789          | 57.7871     | 22.32          | 46.362        | 35.1156          |
| cbt                | 77.8371     | 28.4433        | 49.1792       | 29.7931          | 68.7781     | 22.6021        | 45.1511       | 34.9748          |
| fit                | 194.051     | 3.69306        | 117.29        | 27.8022          | 127.328     | 0.492414       | 120.396       | 24.2975          |
| fusl               | 19.7608     | 9.53204        | 14.7973       | 7.02418          | 22.6042     | 10.1612        | 15.7498       | 9.99844          |
| pncr008:3L         | 4.79922     | 2.04831        | 6.15255       | 9.63875          | 21.3405     | 7.46           | 9.97386       | 11.9751          |
| sug                | 38.6377     | 8.68087        | 25.911        | 24.2051          | 50.391      | 10.487         | 31.6625       | 30.1239          |
| sxe2               | 142.572     | 48.9513        | 173.881       | 125.249          | 161.47      | 52.1874        | 202.785       | 157.193          |
| tobi               | 14.7797     | 5.32715        | 0.661454      | 0.567016         | 16.5253     | 5.34981        | 0.703703      | 0.619935         |
| vkg                | 10.1989     | 2.77024        | 10.0382       | 6.95671          | 11.2359     | 3.16846        | 10.6213       | 5.89651          |

| <b>Continued.</b><br>Gene | white fed-1 | white fasted-1 | crtc ko fed-1 | crtc ko fasted-1 | white fed-2 | white fasted-2 | crtc ko fed-2 | crtc ko fasted-2 |
|---------------------------|-------------|----------------|---------------|------------------|-------------|----------------|---------------|------------------|
| yellow-c                  | 36.7338     | 14.5286        | 30.4778       | 19.7912          | 33.6554     | 13.344         | 22.6949       | 17.3511          |

**Table S3. 85 fasting-inducible genes shown in the volcano plot in Figure 2B.**

| GeneID   | log2(FC)   | StdErr     | Wald-Stats | P-value   | P-adj     |
|----------|------------|------------|------------|-----------|-----------|
| CG5966   | 4.33079299 | 0.17712939 | 24.4498839 | 5.05E-132 | 4.72E-128 |
| ade2     | 3.16077359 | 0.1523123  | 20.7519266 | 1.18E-95  | 5.51E-92  |
| CG11089  | 3.13749236 | 0.15537531 | 20.1929912 | 1.13E-90  | 3.52E-87  |
| Cyp4e3   | 3.593549   | 0.19461764 | 18.4646619 | 3.98E-76  | 9.30E-73  |
| ade3     | 2.9366143  | 0.16958987 | 17.3159769 | 3.56E-67  | 6.67E-64  |
| CG1673   | 2.70535658 | 0.16406354 | 16.4896877 | 4.35E-61  | 6.79E-58  |
| CG10383  | 2.9115558  | 0.17705937 | 16.4439517 | 9.27E-61  | 1.24E-57  |
| Gllspla2 | 2.85526943 | 0.19327914 | 14.7727756 | 2.19E-49  | 2.57E-46  |
| Mal-B2   | 2.59325423 | 0.18375692 | 14.1124165 | 3.18E-45  | 3.31E-42  |
| atk      | 3.19370404 | 0.22681261 | 14.0808043 | 4.98E-45  | 4.67E-42  |
| bmm      | 2.08366935 | 0.16480268 | 12.6434195 | 1.22E-36  | 9.49E-34  |
| Nmdmc    | 1.98490694 | 0.15922078 | 12.4663808 | 1.14E-35  | 8.20E-33  |
| ade5     | 2.12263631 | 0.17082649 | 12.4256861 | 1.90E-35  | 1.27E-32  |
| aay      | 1.77895646 | 0.14795327 | 12.0237724 | 2.67E-33  | 1.66E-30  |
| Etf-QO   | 1.842308   | 0.16378618 | 11.2482506 | 2.36E-29  | 1.38E-26  |
| Amy-p    | 2.17460228 | 0.20346958 | 10.6876038 | 1.16E-26  | 6.41E-24  |
| mag      | 2.95757382 | 0.2770273  | 10.6761096 | 1.32E-26  | 6.85E-24  |
| CG10924  | 2.71639513 | 0.26326238 | 10.3182049 | 5.83E-25  | 2.87E-22  |
| Sardh    | 1.85483228 | 0.18678915 | 9.93008557 | 3.08E-23  | 1.44E-20  |
| AdSL     | 1.71774905 | 0.17408628 | 9.86722827 | 5.77E-23  | 2.57E-20  |
| Lst      | 1.97544546 | 0.20180764 | 9.78875451 | 1.26E-22  | 5.35E-20  |
| CG8654   | 1.79637847 | 0.18929724 | 9.48972369 | 2.32E-21  | 8.03E-19  |
| CG3011   | 1.95558284 | 0.20602234 | 9.49209124 | 2.26E-21  | 8.03E-19  |
| CG8129   | 1.94770285 | 0.21516241 | 9.05224494 | 1.40E-19  | 4.52E-17  |
| CG7763   | 2.48990131 | 0.27596993 | 9.02236466 | 1.84E-19  | 5.74E-17  |
| CG11899  | 1.846077   | 0.20543006 | 8.98640153 | 2.55E-19  | 7.47E-17  |
| CG16758  | 1.3974266  | 0.1575668  | 8.86878849 | 7.39E-19  | 2.10E-16  |
| CG3036   | 1.32327848 | 0.14964033 | 8.84306057 | 9.31E-19  | 2.56E-16  |
| Ahcy     | 1.95358643 | 0.22157011 | 8.81701258 | 1.18E-18  | 3.14E-16  |
| CG5955   | 1.78528845 | 0.20283793 | 8.80155115 | 1.35E-18  | 3.51E-16  |
| CG5953   | 1.60724911 | 0.18579688 | 8.65057091 | 5.12E-18  | 1.30E-15  |
| CG7059   | 1.77785989 | 0.20600059 | 8.63036307 | 6.12E-18  | 1.51E-15  |
| Gnmt     | 1.45487565 | 0.17176301 | 8.47024999 | 2.45E-17  | 5.73E-15  |
| CG11425  | 1.84642097 | 0.2222947  | 8.30618542 | 9.88E-17  | 2.26E-14  |
| Cyp6a8   | 2.07779933 | 0.25373857 | 8.18874067 | 2.64E-16  | 5.75E-14  |
| fbp      | 1.5321324  | 0.18844424 | 8.13042837 | 4.28E-16  | 8.90E-14  |
| Thor     | 1.38110854 | 0.17109593 | 8.07212986 | 6.91E-16  | 1.41E-13  |
| hll      | 2.2705306  | 0.28429927 | 7.98641025 | 1.39E-15  | 2.77E-13  |
| pug      | 1.42499161 | 0.18376887 | 7.75425999 | 8.89E-15  | 1.60E-12  |

| <b>Continued.</b><br>GeneID | log2(FC)   | StdErr     | Wald-Stats | P-value  | P-adj      |
|-----------------------------|------------|------------|------------|----------|------------|
| CG42876                     | 1.66647501 | 0.21636842 | 7.70202528 | 1.34E-14 | 2.37E-12   |
| Tsp42Ed                     | 1.72925756 | 0.22504991 | 7.68388464 | 1.54E-14 | 2.68E-12   |
| yip2                        | 1.21904335 | 0.1660707  | 7.34050845 | 2.13E-13 | 3.50E-11   |
| Spat                        | 1.56204135 | 0.2134938  | 7.3165655  | 2.54E-13 | 4.04E-11   |
| CG15337                     | 2.05897188 | 0.28494763 | 7.22579042 | 4.98E-13 | 7.77E-11   |
| Spn88Eb                     | 1.5063443  | 0.2104895  | 7.15638687 | 8.28E-13 | 1.27E-10   |
| Cyp6w1                      | 1.1926009  | 0.17401244 | 6.85353834 | 7.20E-12 | 1.07E-09   |
| Sirup                       | 1.47496422 | 0.21863887 | 6.74612073 | 1.52E-11 | 2.18E-09   |
| wb                          | 1.46438027 | 0.22094105 | 6.62792303 | 3.40E-11 | 4.69E-09   |
| GLS                         | 1.11991827 | 0.17037028 | 6.57343698 | 4.92E-11 | 6.67E-09   |
| ldgf1                       | 1.19032549 | 0.18178714 | 6.5479082  | 5.83E-11 | 7.80E-09   |
| Reg-2                       | 1.40074435 | 0.21901437 | 6.39567335 | 1.60E-10 | 2.11E-08   |
| Amy-d                       | 1.06778749 | 0.16794455 | 6.35797627 | 2.04E-10 | 2.66E-08   |
| CG9547                      | 1.33179256 | 0.21094019 | 6.31360268 | 2.73E-10 | 3.50E-08   |
| CG1441                      | 1.31857834 | 0.20893322 | 6.31100369 | 2.77E-10 | 3.51E-08   |
| CG7530                      | 1.04288769 | 0.16785713 | 6.21294824 | 5.20E-10 | 6.32E-08   |
| CG32687                     | 1.080355   | 0.17551157 | 6.15546301 | 7.49E-10 | 8.92E-08   |
| CG42806                     | 1.27776132 | 0.2096659  | 6.09427332 | 1.10E-09 | 1.29E-07   |
| CG3902                      | 1.04470894 | 0.17309614 | 6.03542588 | 1.59E-09 | 1.75E-07   |
| ImpL2                       | 1.13115728 | 0.19020856 | 5.94693163 | 2.73E-09 | 2.84E-07   |
| CG8468                      | 1.08106829 | 0.18473655 | 5.85194575 | 4.86E-09 | 4.84E-07   |
| Cyp4p1                      | 1.03219536 | 0.17823578 | 5.79117919 | 6.99E-09 | 6.81E-07   |
| Lip4                        | 1.12438199 | 0.19420442 | 5.78968286 | 7.05E-09 | 6.81E-07   |
| CG6287                      | 1.22829181 | 0.21210893 | 5.79085388 | 7.00E-09 | 6.81E-07   |
| Adgf-D                      | 1.29481189 | 0.22451342 | 5.7671914  | 8.06E-09 | 7.70E-07   |
| Cyp4e2                      | 1.07176156 | 0.18747147 | 5.71693158 | 1.08E-08 | 1.01E-06   |
| CG6767                      | 1.06999887 | 0.19510008 | 5.48435891 | 4.15E-08 | 3.53E-06   |
| CG31075                     | 1.06054354 | 0.19422808 | 5.46029972 | 4.75E-08 | 4.01E-06   |
| CG3999                      | 1.27818047 | 0.23706709 | 5.39164037 | 6.98E-08 | 5.80E-06   |
| Grip                        | 1.25588634 | 0.2335603  | 5.37713957 | 7.57E-08 | 6.21E-06   |
| CG18003                     | 1.00841335 | 0.1882051  | 5.35805547 | 8.41E-08 | 6.79E-06   |
| CG8249                      | 1.23900556 | 0.23904013 | 5.18325339 | 2.18E-07 | 1.67E-05   |
| CG34136                     | 1.18369621 | 0.23197432 | 5.10270369 | 3.35E-07 | 2.51E-05   |
| CG12262                     | 1.33599523 | 0.26764259 | 4.99171395 | 5.98E-07 | 4.39E-05   |
| Cyp6a2                      | 1.01493967 | 0.21266842 | 4.77240431 | 1.82E-06 | 0.00011917 |
| CG42751                     | 1.32047186 | 0.27951238 | 4.72419813 | 2.31E-06 | 0.00014322 |
| Sclp                        | 1.08502127 | 0.23018223 | 4.71374904 | 2.43E-06 | 0.00014978 |
| Cyp6g1                      | 1.00198998 | 0.21651273 | 4.62785714 | 3.69E-06 | 0.00021616 |
| CG5321                      | 1.05681301 | 0.23451585 | 4.50636069 | 6.59E-06 | 0.00035129 |
| CG14022                     | 1.0624592  | 0.25178017 | 4.21978911 | 2.45E-05 | 0.00115609 |
| Cyp4ac3                     | 1.06923614 | 0.2544187  | 4.20266328 | 2.64E-05 | 0.00123468 |



| <b>Continued.</b><br>GeneID | log2(FC)   | StdErr     | Wald-Stats | P-value    | P-adj      |
|-----------------------------|------------|------------|------------|------------|------------|
| CG13283                     | 1.11248683 | 0.26641264 | 4.17580342 | 2.97E-05   | 0.00136927 |
| CG11125                     | 1.15135585 | 0.27753604 | 4.14849129 | 3.35E-05   | 0.00151608 |
| CG9757                      | 1.08221961 | 0.27631559 | 3.91660715 | 8.98E-05   | 0.00367098 |
| CG18858                     | 1.01207884 | 0.26581804 | 3.80741222 | 0.00014043 | 0.00545457 |
| CG1942                      | 1.00509407 | 0.27973988 | 3.59295956 | 0.00032694 | 0.0112519  |

**Table S4. 60 fasting-downregulated genes shown in the volcano plot in Figure 2B.**

| GeneID     | log2(FC)   | StdErr     | Wald-Stats | P-value  | P-adj    |
|------------|------------|------------|------------|----------|----------|
| fit        | -3.5762559 | 0.26512446 | -13.48897  | 1.82E-41 | 1.55E-38 |
| Gbs-70E    | -1.9196215 | 0.19697233 | -9.7456405 | 1.93E-22 | 7.84E-20 |
| Nplp2      | -1.5266688 | 0.15691936 | -9.7290022 | 2.27E-22 | 8.85E-20 |
| Lsp1beta   | -1.6273616 | 0.17098354 | -9.5176507 | 1.77E-21 | 6.63E-19 |
| sxe2       | -1.4312305 | 0.15719376 | -9.104881  | 8.64E-20 | 2.89E-17 |
| Root       | -2.2780153 | 0.25349418 | -8.98646   | 2.55E-19 | 7.47E-17 |
| Clect27    | -1.484961  | 0.1727634  | -8.5953444 | 8.30E-18 | 1.99E-15 |
| CG5991     | -1.3391342 | 0.16188923 | -8.2719165 | 1.32E-16 | 2.94E-14 |
| Obp99b     | -1.2729592 | 0.15587903 | -8.166328  | 3.18E-16 | 6.76E-14 |
| cbt        | -1.3773248 | 0.17391483 | -7.9195365 | 2.38E-15 | 4.65E-13 |
| Nplp3      | -1.3905998 | 0.17687821 | -7.8619056 | 3.78E-15 | 7.23E-13 |
| CCHa2      | -1.3857296 | 0.17795735 | -7.7868636 | 6.87E-15 | 1.29E-12 |
| Col4a1     | -1.4196454 | 0.18298442 | -7.7582855 | 8.61E-15 | 1.58E-12 |
| CG5773     | -1.4731574 | 0.19314917 | -7.6270449 | 2.40E-14 | 4.09E-12 |
| vkg        | -1.4492649 | 0.19744278 | -7.3401769 | 2.13E-13 | 3.50E-11 |
| GNBP-like3 | -1.4389712 | 0.19638398 | -7.3273348 | 2.35E-13 | 3.79E-11 |
| sug        | -1.6214829 | 0.22874152 | -7.0887125 | 1.35E-12 | 2.04E-10 |
| CG13607    | -1.5944815 | 0.23343529 | -6.8305076 | 8.46E-12 | 1.24E-09 |
| CG3348     | -1.7081441 | 0.25328017 | -6.7440895 | 1.54E-11 | 2.18E-09 |
| CG6126     | -1.2143637 | 0.18111205 | -6.7050412 | 2.01E-11 | 2.81E-09 |
| PGRP-SB1   | -1.4232389 | 0.22655293 | -6.2821477 | 3.34E-10 | 4.17E-08 |
| CG9498     | -1.3841018 | 0.22039792 | -6.2800131 | 3.39E-10 | 4.17E-08 |
| CG15096    | -1.0011913 | 0.16444303 | -6.0883777 | 1.14E-09 | 1.32E-07 |
| CG16772    | -1.1618649 | 0.19159853 | -6.0640592 | 1.33E-09 | 1.52E-07 |
| Listericin | -1.2267676 | 0.20258241 | -6.0556475 | 1.40E-09 | 1.58E-07 |
| CG7203     | -1.435104  | 0.23846328 | -6.018134  | 1.76E-09 | 1.92E-07 |
| CG3630     | -1.2729309 | 0.21173961 | -6.011775  | 1.84E-09 | 1.97E-07 |
| apolpp     | -1.2223505 | 0.20348011 | -6.0072235 | 1.89E-09 | 2.01E-07 |
| Lsp2       | -1.6441519 | 0.27566933 | -5.9642179 | 2.46E-09 | 2.59E-07 |
| CG15282    | -1.6941467 | 0.2850756  | -5.942798  | 2.80E-09 | 2.88E-07 |
| Cyp313a1   | -1.1865224 | 0.2010501  | -5.9016256 | 3.60E-09 | 3.66E-07 |
| phu        | -1.6716687 | 0.28431462 | -5.8796438 | 4.11E-09 | 4.14E-07 |
| tobi       | -1.2873143 | 0.22373805 | -5.7536674 | 8.73E-09 | 8.26E-07 |
| TotX       | -1.4398967 | 0.25067511 | -5.7440752 | 9.24E-09 | 8.65E-07 |
| Tig        | -1.1478994 | 0.20428546 | -5.6190948 | 1.92E-08 | 1.74E-06 |
| CG14688    | -1.1872298 | 0.21415973 | -5.5436649 | 2.96E-08 | 2.64E-06 |

| <b>Continued.</b><br>GeneID | log2(FC)   | StdErr     | Wald-Stats | P-value    | P-adj      |
|-----------------------------|------------|------------|------------|------------|------------|
| CG5162                      | -1.0595514 | 0.1920967  | -5.515719  | 3.47E-08   | 3.04E-06   |
| CG4000                      | -1.0964477 | 0.1990289  | -5.5089872 | 3.61E-08   | 3.13E-06   |
| CG14439                     | -1.1879716 | 0.21633764 | -5.491285  | 3.99E-08   | 3.43E-06   |
| IM14                        | -1.1223813 | 0.20907532 | -5.3683107 | 7.95E-08   | 6.47E-06   |
| CG2781                      | -1.1429309 | 0.21539913 | -5.3061075 | 1.12E-07   | 8.88E-06   |
| Ork1                        | -1.1338305 | 0.21540529 | -5.2637076 | 1.41E-07   | 1.10E-05   |
| CG14567                     | -1.3241685 | 0.26559819 | -4.9856084 | 6.18E-07   | 4.48E-05   |
| Hml                         | -1.2258845 | 0.2466466  | -4.9702061 | 6.69E-07   | 4.78E-05   |
| CG4462                      | -1.1532905 | 0.23343686 | -4.9404818 | 7.79E-07   | 5.53E-05   |
| CG18302                     | -1.0744436 | 0.22143903 | -4.8520969 | 1.22E-06   | 8.47E-05   |
| CG9436                      | -1.0864491 | 0.22693458 | -4.787499  | 1.69E-06   | 0.00011292 |
| CG9416                      | -1.1058789 | 0.2332915  | -4.7403312 | 2.13E-06   | 0.00013587 |
| CG10516                     | -1.1615496 | 0.25001378 | -4.6459425 | 3.39E-06   | 0.00020314 |
| MFS9                        | -1.07104   | 0.23400655 | -4.5769658 | 4.72E-06   | 0.00026765 |
| CG10026                     | -1.0382808 | 0.22873108 | -4.5393078 | 5.64E-06   | 0.00030539 |
| Cpr49Ae                     | -1.0021296 | 0.22374828 | -4.4788261 | 7.51E-06   | 0.00039033 |
| CG4797                      | -1.067875  | 0.24858567 | -4.2958027 | 1.74E-05   | 0.00084864 |
| CG14298                     | -1.0553688 | 0.25283507 | -4.1741393 | 2.99E-05   | 0.00137256 |
| CG42821                     | -1.1611169 | 0.28471349 | -4.078194  | 4.54E-05   | 0.00199468 |
| Cdk4                        | -1.0334038 | 0.26145659 | -3.9524872 | 7.73E-05   | 0.0032613  |
| CG16978                     | -1.0134907 | 0.25761029 | -3.9342013 | 8.35E-05   | 0.00345299 |
| caix                        | -1.1009349 | 0.28402448 | -3.8761973 | 0.0001061  | 0.00426274 |
| CG9400                      | -1.0885597 | 0.284925   | -3.8205133 | 0.00013317 | 0.00521608 |
| CG11741                     | -1.0147853 | 0.2817239  | -3.6020561 | 0.00031571 | 0.01094579 |

**Table S5. KEGG pathway analysis for genes in Table 1.**

| PathwayName                                | #Gene | Statistics                                            |
|--------------------------------------------|-------|-------------------------------------------------------|
| Metabolic pathways                         | 29    | C=892;O=29;E=2.22;R=13.08;rawP=4.39e-26;adjP=5.71e-25 |
| Limonene and pinene degradation            | 7     | C=68;O=7;E=0.17;R=41.41;rawP=3.45e-10;adjP=2.24e-09   |
| Glycine, serine and threonine metabolism   | 5     | C=27;O=5;E=0.07;R=74.50;rawP=6.14e-09;adjP=2.66e-08   |
| One carbon pool by folate                  | 3     | C=11;O=3;E=0.03;R=109.71;rawP=2.37e-06;adjP=7.70e-06  |
| Purine metabolism                          | 5     | C=120;O=5;E=0.30;R=16.76;rawP=1.22e-05;adjP=3.17e-05  |
| Starch and sucrose metabolism              | 3     | C=55;O=3;E=0.14;R=21.94;rawP=0.0003;adjP=0.0006       |
| Pentose phosphate pathway                  | 2     | C=22;O=2;E=0.05;R=36.57;rawP=0.0014;adjP=0.0024       |
| Ether lipid metabolism                     | 2     | C=23;O=2;E=0.06;R=34.98;rawP=0.0015;adjP=0.0024       |
| Lysine degradation                         | 2     | C=26;O=2;E=0.06;R=30.94;rawP=0.0019;adjP=0.0027       |
| Fatty acid metabolism                      | 2     | C=28;O=2;E=0.07;R=28.73;rawP=0.0022;adjP=0.0029       |
| Valine, leucine and isoleucine degradation | 2     | C=31;O=2;E=0.08;R=25.95;rawP=0.0027;adjP=0.0032       |
| Glycerolipid metabolism                    | 2     | C=43;O=2;E=0.11;R=18.71;rawP=0.0051;adjP=0.0055       |
| Glycerophospholipid metabolism             | 2     | C=55;O=2;E=0.14;R=14.63;rawP=0.0083;adjP=0.0083       |

C: the number of reference genes in the category

O: the number of genes in the gene set and also in the category

E: the expected number in the category

R: ratio of enrichment rawP: p value from hypergeometric test

adjP: p value adjusted by the multiple test adjustment

**Table S6. CRTC-dependent fasting-inducible genes shown in Figure 2C.**

| Gene          | white fed-1 | white fasted-1 | crtc ko fed-1 | crtc ko fasted-1 | white fed-2 | white fasted-2 | crtc ko fed-2 | crtc ko fasted-2 |
|---------------|-------------|----------------|---------------|------------------|-------------|----------------|---------------|------------------|
| ade2          | 21.9207     | 224.684        | 21.7226       | 31.0683          | 20.24       | 221.158        | 20.5704       | 27.9121          |
| CR45018,IP3K2 | 10.904      | 26.6712        | 3.3112        | 4.0368           | 8.94743     | 30.7661        | 6.71452       | 4.91237          |
| ImpL2         | 45.175      | 110.759        | 34.0735       | 23.3999          | 37.1806     | 94.5664        | 30.6086       | 19.1425          |
| CG11425       | 13.6814     | 65.9586        | 9.14394       | 15.0363          | 16.2685     | 88.0609        | 9.95437       | 19.2099          |
| rost          | 6.22428     | 17.0486        | 4.69874       | 4.01136          | 4.88496     | 15.5597        | 3.20835       | 3.38676          |
| CG8317(Lst)   | 57.4598     | 256.195        | 60.7098       | 60.3549          | 50.6727     | 221.342        | 58.879        | 55.5653          |
| CG6385(Sardh) | 8.79331     | 43.2456        | 9.08925       | 10.5644          | 10.5677     | 41.6326        | 8.95202       | 11.514           |
| CG3999        | 4.33155     | 11.1878        | 3.11073       | 2.90627          | 3.22242     | 10.3202        | 2.96295       | 4.03465          |
| AdSL          | 16.7971     | 63.3695        | 16.2366       | 16.7526          | 17.5305     | 69.3623        | 15.0338       | 19.542           |
| Cyp4p1        | 26.191      | 61.8988        | 12.4212       | 18.2753          | 25.0887     | 54.4007        | 13.2449       | 18.4404          |
| CG6188(Gnmt)  | 161.718     | 441.55         | 80.8978       | 134.305          | 170.253     | 485.444        | 112.259       | 171.064          |
| ldgf1         | 32.2723     | 83.9368        | 24.8749       | 25.8994          | 28.6079     | 72.6051        | 20.1755       | 28.8307          |

**Table S7. CRE sites and scores for genes shown in Figure 2C.**

| Gene    | All_CREs                                                                                                                 | CRE_Score_Sum |
|---------|--------------------------------------------------------------------------------------------------------------------------|---------------|
| CR45018 | H(-1653)_1.00;H(-1638)_1.00;H(-1513)_1.00;H(-1489)_1.00;F(-1110)_1.00;H(-981)_0.30;H(-639)_0.99;H(-424)_0.00;H(183)_1.00 | 2.94          |
| Lst     | H(-1938)_1.00;H(-1327)_0.51;H(-1095)_1.00;H(-954)_1.00;H(-660)_1.00;H(-416)_1.00;H(-334)_1.00                            | 2.49          |
| ade2    | H(-1798)_0.72;H(-1667)_1.00;H(-1560)_1.00;H(-1077)_0.77;H(-520)_0.00;H(289)_1.00;H(431)_1.00                             | 1.99          |
| ImpL2   | F(-245)_1.00;H(-136)_0.96                                                                                                | 1.40          |
| CG11425 | H(-636)_1.00;H(-163)_1.00;H(175)_0.87                                                                                    | 1.31          |
| Gnmt    | H(-398)_0.00;H(-294)_0.78;H(-156)_0.86;H(-133)_1.00                                                                      | 1.26          |
| ldgf1   | H(-776)_1.00;H(-544)_0.89;H(-532)_0.70                                                                                   | 1.09          |
| Sardh   | H(-1199)_0.99;H(-97)_0.98                                                                                                | 0.82          |
| AdSL    | H(-1818)_1.00;H(-1640)_0.03;H(-1101)_1.00;H(-481)_0.01                                                                   | 0.65          |
| CG3999  | H(-1890)_0.00;H(-372)_0.01;H(-51)_0.05;H(179)_0.80                                                                       | 0.41          |
| Cyp4p1  | H(-1289)_0.38;H(-833)_0.46;H(20)_0.00                                                                                    | 0.31          |

**Table S8. Genes lower expressed in *crtc* ko under both feeding and fasting condition.**

|           |         |          |         |         |         |
|-----------|---------|----------|---------|---------|---------|
| Aats-lys  | lr75a   | phr      | CG10514 | CG31954 | CG5646  |
| Acp65Aa   | lr75b   | plx      | CG11426 | CG32364 | CG5791  |
| Amy-d     | Jhl-1   | RnrL     | CG11842 | CG32368 | CG6639  |
| Amy-p     | Jhl-21  | Skeletor | CG11892 | CG33123 | CG6910  |
| c-cup     | lig3    | Spn55B   | CG1246  | CG33296 | CG9119  |
| Cyp9f3Psi | Mis12   | ssx      | CG12512 | CG34138 | CG9121  |
| Dgp-1     | noe     | Tektin-C | CG13794 | CG3513  | CG9150  |
| Drsl4     | Oat     | tobi     | CG14186 | CG3699  | CG9305  |
| dtr       | Obp46a  | TpnC41C  | CG15539 | CG42260 | CG9505  |
| Hsp67Bc   | PGRP-SD | w        | CG1667  | CG42876 | CR13130 |
|           | Crtc    |          | CG17264 | CG43064 | CR44283 |
|           |         |          | CG2233  | CG4757  | CR44506 |
|           |         |          | CG30424 | CG5535  | CR44922 |

**Table S9. Genes lower expressed in crtc ko uniquely after fasting treatment.**

|        |         |         |         |
|--------|---------|---------|---------|
| ade2   | ImpL2   | CG11170 | CG3999  |
| AdSL   | Lst     | CG11425 | CG4269  |
| atk    | Mal-B2  | CG12716 | CG5793  |
| CecA2  | nesd    | CG15093 | CG7763  |
| Cyp4p1 | ninaG   | CG15337 | CG7829  |
| Desat1 | PGRP-LB | CG15725 | CG9279  |
| dob    | qin     | CG18003 | CG9766  |
| edin   | rost    | CG31974 | CR31032 |
| Galk   | Rpb12   | CG32052 | CR45018 |
| Gnmt   | Sardh   | CG34166 | CR45299 |
| Got2   | shop    |         |         |
| hll    | slam    |         |         |
| ldgf1  | TotC    |         |         |



**Table S10. Genes lost fasting-induction in both crtc ko and creb ko.**

| Gene          | white fasted | creb ko fasted | white fast/creb ko fast |
|---------------|--------------|----------------|-------------------------|
| ade2          | 224.684      | 47.3793        | 4.74224                 |
| ImpL2         | 110.759      | 32.6851        | 3.388669                |
| CG8317(Lst)   | 256.195      | 87.9635        | 2.912515                |
| CG6385(Sardh) | 43.2456      | 19.179         | 2.254841                |
| CR45018,IP3K2 | 26.6712      | 12.5504        | 2.125127                |
| AdSL          | 63.3695      | 34.9441        | 1.813453                |

**Table S11. Genes having CRE scores greater than 2.50.**

| Genes   | All_CREs                                                                                                                                                                   | CRE_Score_Sum |
|---------|----------------------------------------------------------------------------------------------------------------------------------------------------------------------------|---------------|
| CG14185 | H(-1837)_1.00;H(-1825)_0.48;H(-1813)_0.01;F(-1693)_1.00;H(-1372)_0.00;F(-1192)_1.00;H(-1078)_1.00;H(-661)_1.00;F(-647)_1.00;F(-636)_1.00;H(380)_0.00;H(434)_0.65           | 4.43          |
| CG14186 | F(-1630)_1.00;F(-1619)_1.00;H(-1605)_1.00;H(-1188)_1.00;F(-1074)_1.00;H(-894)_0.00;F(-573)_1.00;H(-453)_0.01;H(-441)_0.48;H(-429)_1.00;H(-72)_0.41                         | 4.29          |
| CG30456 | H(-1785)_1.00;H(-1017)_1.00;F(-931)_1.00;H(-546)_0.00;H(-484)_0.99;H(-434)_1.00;H(-392)_1.00;H(42)_0.31;H(157)_0.97;H(364)_0.97                                            | 3.81          |
| Ets21C  | H(-1991)_0.48;H(-1282)_0.79;H(-1067)_0.80;H(-1051)_1.00;H(-1039)_0.97;H(-566)_0.85;H(-344)_0.00;H(-335)_0.01;H(6)_1.00;H(211)_1.00;H(411)_1.00;H(453)_1.00                 | 3.65          |
| CG1764  | H(-1772)_1.00;H(-1165)_0.00;H(-950)_0.99;H(-608)_0.30;F(-479)_1.00;H(-100)_1.00;H(-76)_1.00;H(49)_1.00;H(64)_1.00                                                          | 3.63          |
| CG45060 | H(-1834)_0.00;H(-1683)_0.00;H(-1214)_0.99;H(-1165)_0.83;H(-1017)_0.94;H(-455)_1.00;H(-415)_1.00;H(-356)_0.91;H(-301)_1.00;H(360)_0.78;H(476)_1.00                          | 3.55          |
| CR44217 | H(-1868)_1.00;H(-1743)_1.00;H(-813)_1.00;H(-375)_0.93;H(-325)_0.06;H(-176)_1.00;H(-111)_0.00;H(-3)_1.00;H(101)_1.00;H(304)_1.00                                            | 3.32          |
| jbug    | H(-1894)_1.00;H(-1695)_1.00;H(-939)_0.00;H(-630)_1.00;F(-66)_1.00;H(194)_1.00;H(211)_1.00;H(240)_0.80                                                                      | 3.28          |
| Hsc70-3 | H(-1806)_1.00;H(-1075)_1.00;H(-990)_0.92;H(-612)_0.94;H(-363)_1.00;H(-287)_1.00;H(169)_1.00;H(258)_1.00                                                                    | 3.25          |
| CG5065  | H(-1832)_1.00;H(-1826)_1.00;F(-763)_1.00;H(-154)_1.00;H(242)_1.00;H(291)_1.00;H(372)_1.00                                                                                  | 3.22          |
| CR44474 | H(-1940)_1.00;H(-879)_1.00;H(-853)_1.00;H(-693)_1.00;H(-235)_1.00;H(148)_1.00;H(216)_1.00;H(222)_0.66                                                                      | 3.19          |
| CG15040 | H(-1758)_0.98;H(-837)_0.00;H(-322)_0.84;H(-246)_1.00;H(-235)_1.00;H(227)_0.05;H(237)_1.00;H(371)_0.41;H(447)_1.00;H(458)_1.00                                              | 3.17          |
| CR45540 | H(-1818)_1.00;H(-1582)_0.95;H(-1395)_0.53;H(-312)_1.00;F(29)_1.00;H(44)_1.00;H(222)_1.00                                                                                   | 3.15          |
| CG44774 | H(-1872)_1.00;H(-1651)_1.00;H(-1642)_0.97;H(-1275)_0.02;H(-1054)_1.00;H(-1045)_1.00;H(-833)_0.58;H(-610)_0.00;H(-601)_0.05;H(-234)_0.66;H(-11)_1.00;H(-2)_0.94;H(365)_0.05 | 3.14          |
| CG17724 | H(-1916)_0.80;H(-1882)_1.00;H(-1876)_0.70;H(-1575)_0.80;H(-1316)_0.77;H(-1284)_0.68;H(-1169)_0.99;H(-974)_1.00;H(-71)_1.00;H(105)_1.00                                     | 3.09          |
| CR44262 | H(-1362)_0.77;F(-692)_0.96;H(-591)_0.00;H(-72)_1.00;H(1)_0.84;H(108)_1.00;H(138)_0.00;H(160)_1.00;H(400)_0.32                                                              | 3.07          |
| thoc7   | H(-1918)_0.98;H(-1847)_0.00;H(-1735)_0.72;H(-1525)_0.74;H(-1444)_0.86;H(-940)_0.84;H(-174)_0.67;H(-167)_0.94;H(70)_1.00;H(161)_1.00                                        | 3.03          |

| Continued. Genes | All_CREs                                                                                                                                                       | CRE_Score_Sum |
|------------------|----------------------------------------------------------------------------------------------------------------------------------------------------------------|---------------|
| chb              | H(-1874)_1.00;H(-1204)_1.00;H(-942)_0.02;H(-660)_0.85;H(-539)_1.00;H(-297)_0.73;H(-119)_1.00;H(427)_0.97;H(447)_0.77                                           | 3.01          |
| CG3770           | H(-1097)_1.00;H(-491)_1.00;H(-323)_0.98;H(-47)_0.95;H(32)_1.00;H(377)_0.96;H(475)_0.80                                                                         | 3.01          |
| CG4880           | H(-1169)_1.00;F(-1112)_0.75;H(-1097)_0.79;H(-752)_0.92;H(-710)_0.82;H(-698)_0.75;H(-447)_0.78;H(-386)_0.99                                                     | 3.00          |
| CR45170          | F(-1940)_1.00;H(-1287)_0.42;H(-786)_0.99;H(-305)_1.00;F(-104)_1.00;H(154)_1.00                                                                                 | 2.97          |
| CR45018          | H(-1653)_1.00;H(-1638)_1.00;H(-1513)_1.00;H(-1489)_1.00;F(-1110)_1.00;H(-981)_0.30;H(-639)_0.99;H(-424)_0.00;H(183)_1.00                                       | 2.94          |
| CR45203          | H(-1642)_0.60;H(-1633)_1.00;H(-1205)_0.53;H(-1174)_1.00;F(-1135)_1.00;H(-1024)_1.00;H(-673)_1.00;H(-598)_1.00                                                  | 2.94          |
| CG8314           | H(-678)_0.64;H(-600)_0.66;H(-321)_0.61;H(-78)_0.95;H(-21)_0.40;H(99)_0.99;H(110)_1.00;H(237)_0.98                                                              | 2.92          |
| C3G              | H(-1576)_0.93;H(-878)_1.00;H(-849)_0.98;H(-843)_0.99;H(-372)_0.20;H(-31)_1.00;F(456)_1.00                                                                      | 2.92          |
| shot             | H(-975)_1.00;H(-397)_0.40;H(-367)_1.00;H(-207)_0.99;H(-195)_0.97;H(-189)_0.06;H(-55)_1.00;H(460)_1.00                                                          | 2.91          |
| SmydA-3          | H(-1716)_1.00;H(-1668)_0.96;H(-1207)_0.00;F(-496)_1.00;H(-122)_0.00;F(33)_1.00;H(180)_0.96;H(431)_0.00                                                         | 2.90          |
| CR45402          | H(-1932)_0.01;H(-1593)_1.00;H(-1587)_1.00;H(-1550)_1.00;H(-1538)_1.00;F(-1293)_1.00;H(-1188)_0.69;H(-1179)_1.00;H(-875)_0.00;H(-823)_0.99                      | 2.88          |
| CR44803          | H(-1456)_1.00;H(-1018)_0.93;H(-968)_0.06;H(-819)_1.00;H(-754)_0.00;H(-646)_1.00;H(-542)_1.00;H(-339)_1.00;H(125)_1.00                                          | 2.88          |
| CG17734          | H(-1936)_1.00;H(-1868)_0.68;H(-1686)_0.57;H(-1256)_0.60;H(-1157)_0.80;H(-999)_0.60;H(-729)_0.00;H(-561)_0.00;H(-446)_1.00;H(-261)_0.31;F(265)_1.00;H(388)_0.07 | 2.88          |
| CG7191           | H(-1474)_1.00;H(-494)_1.00;H(-385)_1.00;H(-326)_1.00;H(-88)_0.22;H(216)_1.00;H(244)_1.00;H(262)_0.33                                                           | 2.87          |
| CG9331           | F(-1355)_1.00;H(-871)_1.00;H(-833)_0.93;H(99)_1.00;H(114)_1.00;H(272)_1.00                                                                                     | 2.86          |
| Cct1             | H(-1286)_0.00;H(-932)_1.00;H(-699)_0.99;H(-607)_0.98;H(-605)_1.00;H(-551)_0.54;F(-108)_1.00                                                                    | 2.84          |
| CR44184          | H(-1068)_0.00;H(-697)_1.00;H(-251)_1.00;H(-59)_1.00;H(-35)_1.00;H(155)_1.00;H(272)_1.00                                                                        | 2.82          |
| Gp93             | H(-1898)_0.95;H(-1512)_0.76;H(-1457)_0.95;H(-768)_1.00;H(23)_0.82;H(91)_1.00;H(298)_0.61;H(411)_1.00                                                           | 2.81          |
| CR45144          | H(-819)_0.08;H(-635)_0.80;H(-510)_0.80;H(-429)_1.00;H(-310)_1.00;H(-162)_0.80;H(-143)_1.00;H(71)_0.66                                                          | 2.81          |
| Dh44             | H(-1633)_1.00;H(-1154)_1.00;H(-620)_1.00;H(-515)_0.72;H(-437)_0.00;H(-331)_1.00;H(-106)_0.00;H(5)_1.00;H(240)_0.98                                             | 2.81          |

| Continued. Genes | All_CREs                                                                                                             | CRE_Score_Sum |
|------------------|----------------------------------------------------------------------------------------------------------------------|---------------|
| IP3K2            | H(-1281)_1.00;H(-1266)_1.00;H(-1141)_1.00;H(-1117)_1.00;F(-738)_1.00;H(-609)_0.30;H(-267)_0.99;H(-52)_0.00           | 2.80          |
| CG14280          | H(-1565)_1.00;H(-1204)_1.00;H(-906)_0.98;H(-807)_1.00;H(-388)_0.00;H(-374)_0.00;H(-172)_0.99;H(76)_1.00;H(217)_0.84  | 2.80          |
| trc              | H(-1479)_0.87;H(-1413)_1.00;H(-1241)_1.00;H(-1060)_0.77;H(-747)_0.81;H(-464)_0.75;H(302)_1.00;H(332)_0.98            | 2.80          |
| CG7365           | H(-1934)_0.00;H(-1706)_1.00;H(-1644)_1.00;H(-1008)_1.00;H(182)_1.00;F(358)_1.00;H(370)_1.00                          | 2.80          |
| LamC             | F(-1396)_1.00;F(-1273)_1.00;H(20)_1.00;H(162)_1.00;H(227)_0.38;H(399)_0.66                                           | 2.79          |
| CR44920          | H(-1829)_1.00;H(-1780)_1.00;H(-1567)_1.00;H(-1339)_1.00;H(-1291)_1.00;H(-1213)_1.00;H(325)_1.00;H(453)_1.00          | 2.78          |
| betaTub56D       | H(-1770)_0.90;H(-1273)_0.00;F(-1142)_1.00;H(-659)_1.00;H(-428)_0.98;H(-299)_1.00;H(117)_1.00                         | 2.77          |
| IP3K1            | F(-1915)_1.00;F(-1562)_1.00;H(-975)_0.91;H(-808)_1.00;H(-723)_1.00;H(-240)_1.00                                      | 2.75          |
| CR44679          | H(-603)_0.41;H(-246)_1.00;H(-234)_0.48;H(-222)_0.01;F(-102)_1.00;H(219)_0.00;F(399)_1.00                             | 2.75          |
| beat-11b         | H(-1924)_1.00;H(-1056)_0.85;H(-339)_1.00;H(-158)_1.00;H(-38)_0.11;H(17)_1.00;H(28)_1.00;H(114)_0.39                  | 2.75          |
| CR45135          | H(-930)_1.00;H(-522)_1.00;H(-222)_1.00;H(67)_1.00;H(74)_1.00;H(219)_1.00;H(403)_0.00                                 | 2.75          |
| CR45306          | F(-1867)_1.00;H(-1819)_1.00;H(-1593)_1.00;F(-1554)_1.00;H(-1538)_0.00;F(-1495)_1.00;H(-816)_1.00                     | 2.74          |
| CR45703          | H(-1649)_1.00;H(-1421)_0.44;H(-1369)_1.00;H(-1349)_1.00;H(-40)_1.00;H(37)_0.40;H(176)_1.00;H(223)_1.00               | 2.74          |
| CG13594          | H(-1579)_0.05;H(-726)_1.00;H(-566)_1.00;H(-238)_1.00;H(175)_1.00;H(244)_1.00;H(278)_1.00                             | 2.73          |
| svr              | H(-883)_1.00;H(-819)_1.00;H(-761)_0.00;H(-91)_0.27;H(-44)_0.66;F(20)_1.00;H(73)_1.00                                 | 2.73          |
| GLS              | H(-1925)_0.22;H(-1874)_0.60;H(-1629)_0.36;H(-658)_0.14;F(-238)_1.00;H(-209)_1.00;H(151)_0.97;H(242)_1.00             | 2.73          |
| CR45376          | F(-1352)_1.00;F(-1296)_1.00;H(-1144)_0.02;H(-676)_1.00;H(-1)_0.99;H(196)_0.99                                        | 2.73          |
| CG8713           | H(-1816)_0.19;H(-1040)_0.81;F(-56)_1.00;H(-42)_1.00;F(409)_1.00                                                      | 2.72          |
| CR44661          | H(-1439)_1.00;H(-1391)_0.97;H(79)_1.00;H(154)_0.99;H(201)_1.00;H(353)_1.00;H(422)_0.41                               | 2.72          |
| Pak              | H(-1933)_0.00;H(-1821)_0.00;H(-1676)_1.00;H(-1484)_0.98;H(-771)_1.00;H(-764)_1.00;H(37)_0.82;H(247)_1.00;H(420)_0.97 | 2.72          |
| Glut4EF          | H(-1751)_0.98;H(-1337)_0.69;H(-610)_1.00;H(-438)_1.00;H(-427)_1.00;H(392)_0.98;H(430)_1.00                           | 2.71          |

| Continued. Genes | All_CREs                                                                                                            | CRE_Score_Sum |
|------------------|---------------------------------------------------------------------------------------------------------------------|---------------|
| Rab1             | H(-1785)_0.93;H(-1592)_0.80;H(-1319)_0.80;H(-1034)_0.34;H(-761)_1.00;H(16)_1.00;H(298)_1.00;H(400)_1.00             | 2.71          |
| CG3408           | H(-1775)_0.17;H(-1556)_0.81;H(-1158)_1.00;H(-896)_1.00;H(-890)_1.00;H(-465)_0.81;H(70)_0.03;H(171)_0.97;H(475)_1.00 | 2.71          |
| CR43440          | H(-1500)_1.00;H(-1495)_0.85;H(-1484)_1.00;H(-1267)_1.00;H(-211)_1.00;H(-2)_1.00;H(9)_1.00                           | 2.71          |
| AP-2alpha        | H(-1911)_0.80;H(-1689)_0.96;H(-1451)_0.13;H(-607)_0.83;F(-240)_0.99;H(426)_1.00;H(451)_1.00                         | 2.70          |
| mir-988          | H(-1962)_0.99;H(-1534)_0.80;H(-1241)_0.80;H(-997)_1.00;H(-982)_1.00;H(-322)_1.00;H(4)_0.00;H(288)_0.73;H(345)_0.80  | 2.69          |
| l(2)efl          | H(-1926)_0.89;F(-1514)_0.95;H(-1309)_0.16;H(-703)_1.00;H(-568)_1.00;H(-104)_1.00;H(444)_0.60;H(465)_0.48            | 2.68          |
| CG5214           | H(-918)_0.99;F(-840)_0.98;H(-690)_0.07;F(-567)_1.00;H(-41)_0.31;H(144)_1.00;H(259)_0.00;H(427)_0.00                 | 2.68          |
| CR45658          | H(-897)_1.00;H(-544)_1.00;H(-481)_0.97;H(112)_0.02;H(192)_1.00;H(241)_1.00;H(250)_1.00                              | 2.67          |
| ort              | H(-2000)_0.87;H(-1898)_1.00;F(-764)_1.00;H(-376)_1.00;H(-87)_0.94;H(203)_0.99                                       | 2.67          |
| mir-9a           | H(-1733)_1.00;H(-1681)_1.00;H(-1167)_1.00;H(-687)_0.79;H(-259)_1.00;H(43)_1.00;H(427)_1.00                          | 2.66          |
| E2f1             | H(-1211)_1.00;H(-447)_0.97;H(-351)_1.00;H(-132)_0.99;F(215)_1.00                                                    | 2.66          |
| CR45650          | H(-1179)_0.99;H(-226)_1.00;H(-60)_0.97;H(281)_1.00;F(414)_1.00                                                      | 2.66          |
| CG42321          | H(-848)_0.99;H(-700)_0.95;H(-113)_0.99;H(157)_1.00;H(280)_1.00;H(394)_1.00                                          | 2.66          |
| CR45371          | H(-1538)_1.00;H(-1251)_0.44;H(-1050)_0.52;H(-384)_0.48;H(-348)_1.00;H(-127)_1.00;H(-90)_0.80;H(326)_0.99            | 2.65          |
| CR46055          | H(-1332)_1.00;H(-1248)_0.00;H(-993)_0.00;F(-226)_1.00;H(121)_0.99;H(340)_1.00;H(436)_0.97                           | 2.65          |
| CG10948          | H(-1943)_0.03;H(-968)_0.79;H(-289)_0.99;F(-268)_1.00;H(-71)_1.00;H(408)_1.00                                        | 2.64          |
| CR44269          | H(-1601)_1.00;H(-535)_1.00;H(-326)_1.00;H(-193)_1.00;H(-156)_1.00;H(-132)_1.00                                      | 2.63          |
| CG13919          | H(-1580)_0.80;H(-1140)_0.77;H(-905)_0.60;H(-603)_0.86;H(-442)_0.60;H(-277)_1.00;H(-93)_0.06;H(176)_0.80;H(271)_0.79 | 2.63          |
| CR45606          | H(-1913)_1.00;F(-1821)_1.00;H(-1801)_1.00;H(-1281)_1.00;H(-1070)_1.00;H(-1012)_1.00;H(130)_0.94                     | 2.61          |
| Nmdar2           | H(-1691)_0.00;H(-705)_1.00;H(-602)_0.82;H(-265)_0.82;H(1)_0.98;F(96)_1.00                                           | 2.60          |
| Proc             | H(-1379)_0.00;H(-1006)_0.94;H(-774)_1.00;H(-744)_1.00;H(-256)_1.00;H(32)_1.00;H(183)_1.00                           | 2.60          |
| Wbp2             | H(-1478)_0.80;H(-455)_1.00;H(24)_1.00;F(221)_1.00;H(242)_0.99                                                       | 2.60          |

| Continued. Genes | All_CREs                                                                                                                      | CRE_Score_Sum |
|------------------|-------------------------------------------------------------------------------------------------------------------------------|---------------|
| CR45579          | H(-1128)_0.09;H(-1015)_1.00;H(-1009)_1.00;H(-533)_1.00;H(-426)_1.00;H(189)_1.00;H(270)_0.99                                   | 2.60          |
| CR45874          | H(-1728)_0.68;H(-1408)_0.95;H(-908)_1.00;H(-604)_0.97;H(-503)_0.03;H(32)_0.81;H(457)_1.00;H(463)_1.00                         | 2.60          |
| CG15861          | H(-1539)_0.80;H(-1441)_0.96;H(-1096)_1.00;H(-1017)_0.95;H(-741)_0.98;H(-573)_1.00;H(33)_1.00                                  | 2.60          |
| CG44038          | H(-1008)_1.00;H(-943)_1.00;H(-600)_1.00;H(-508)_1.00;H(37)_1.00;H(176)_1.00                                                   | 2.59          |
| CG7550           | H(-1566)_0.80;H(-1461)_0.72;H(-1149)_1.00;H(-987)_0.73;H(-333)_0.20;H(-153)_0.60;H(78)_0.82;H(167)_0.82;H(177)_0.66           | 2.59          |
| Dak1             | H(-1790)_0.59;H(-1138)_0.44;H(-968)_0.64;H(-471)_0.20;F(-3)_1.00;H(99)_1.00;H(192)_0.93                                       | 2.58          |
| CG13982          | H(-1940)_0.03;H(-1460)_0.04;H(-1315)_0.90;H(-773)_0.78;H(-79)_0.00;H(75)_1.00;H(118)_0.99;H(124)_1.00;H(137)_1.00;H(316)_0.01 | 2.58          |
| Nplp1            | H(-1212)_0.99;H(-1177)_1.00;F(-156)_1.00;H(-78)_0.97;H(422)_0.98                                                              | 2.58          |
| caix             | H(-1522)_0.01;H(-968)_0.61;H(-788)_0.07;H(-549)_1.00;H(-419)_1.00;H(-373)_1.00;H(-334)_0.49;H(-4)_1.00;H(27)_0.52             | 2.57          |
| CG1607           | H(-1786)_0.97;H(-780)_0.00;H(-2)_0.95;H(285)_0.99;F(307)_1.00;H(454)_1.00                                                     | 2.57          |
| CG32812          | H(-1410)_1.00;H(-1173)_0.71;H(-650)_0.00;H(-523)_0.44;H(-451)_0.92;H(-402)_1.00;H(98)_0.95;H(219)_1.00                        | 2.56          |
| CR45501          | H(-1210)_0.81;H(-858)_0.80;H(-585)_0.60;H(-471)_1.00;H(-342)_0.61;H(-92)_1.00;H(-17)_0.99                                     | 2.55          |
| REPTOR           | H(-1458)_1.00;H(-782)_1.00;F(-509)_1.00;H(26)_1.00;H(354)_0.99                                                                | 2.54          |
| Pal2             | H(-1965)_1.00;H(-1830)_1.00;H(-1224)_0.16;F(-1019)_0.95;H(-607)_0.89;F(-494)_1.00                                             | 2.54          |
| CG10737          | H(-1795)_1.00;H(-1719)_0.97;H(-287)_1.00;F(-244)_1.00;H(406)_0.86;H(412)_0.42                                                 | 2.53          |
| Sras             | H(-1588)_0.80;H(-1408)_0.79;H(-1382)_0.80;H(-1366)_1.00;H(-496)_0.54;H(-265)_0.97;H(70)_0.93;H(427)_0.66                      | 2.52          |
| CG34135          | H(-1922)_0.80;H(-867)_0.65;H(-564)_0.95;H(-120)_0.94;H(-108)_0.15;H(147)_0.80;H(168)_0.78;H(421)_0.80                         | 2.52          |
| CG32425          | H(-1448)_0.57;H(-1355)_0.61;H(-1189)_0.81;H(-1087)_0.50;H(-939)_0.98;H(-895)_0.60;H(-488)_0.79;H(-275)_0.58;H(429)_0.99       | 2.51          |
